# Supplementary material for: Impact of international travel and diarrhea on gut microbiome and resistome dynamics
Source: PubMed Central journal article supplement (PMC9722912; doi:10.1038/s41467-022-34862-w), 2022-12-05
Supplement: 41467_2022_34862_MOESM1_ESM.pdf [file 41467_2022_34862_MOESM1_ESM.pdf]

## **Supplementary Information**

### **Impact of international travel and diarrhea on gut microbiome and resistome dynamics**

Manish Boolchandani<sup>1,2</sup>, Kevin S. Blake<sup>1,2</sup>, Drake H. Tilley<sup>3</sup>, Miguel M. Cabada<sup>4,5</sup>, Drew J. Schwartz<sup>1,6,7,8,9</sup>, Sanket Patel<sup>1,2</sup>, Maria Luisa Morales<sup>5</sup>, Rina Meza<sup>3</sup>, Giselle Soto<sup>3</sup>, Sandra D. Isidean<sup>10,11</sup>, Chad K. Porter<sup>10</sup>, Mark P. Simons<sup>3,10\*</sup>, Gautam Dantas<sup>1,2,7,12\*</sup>

<sup>1</sup> The Edison Family Center for Genome Sciences and Systems Biology, Washington University School of Medicine, St. Louis, MO, USA

<sup>2</sup> Department of Pathology and Immunology, Washington University School of Medicine, St. Louis, MO, USA

<sup>3</sup> Naval Medical Research Unit No. 6, Callao, Lima, Peru

<sup>4</sup> Department of Internal Medicine, Division of Infectious Diseases, University of Texas Medical Branch, Galveston, TX, USA

<sup>5</sup> Cusco Branch – Tropical Medicine Institute, Universidad Peruana Cayetano Heredia, Lima, Peru

<sup>6</sup> Department of Pediatrics, Division of Infectious Diseases, Washington University School of Medicine, St. Louis, MO, USA

<sup>7</sup> Department of Molecular Microbiology, Washington University School of Medicine, St. Louis, MO, USA

<sup>8</sup> Department of Obstetrics and Gynecology, Washington University in St. Louis, St. Louis, MO, USA

<sup>9</sup> Center for Women's Infectious Diseases Research, Washington University in St. Louis, St. Louis, MO, USA

<sup>10</sup> Naval Medical Research Center, Silver Spring, MD, USA

<sup>11</sup> Henry M. Jackson Foundation for the Advancement of Military Medicine, Inc., Bethesda, MD, USA

<sup>12</sup> Department of Biomedical Engineering, Washington University in St. Louis, St. Louis, MO, USA

## Supplementary Figures

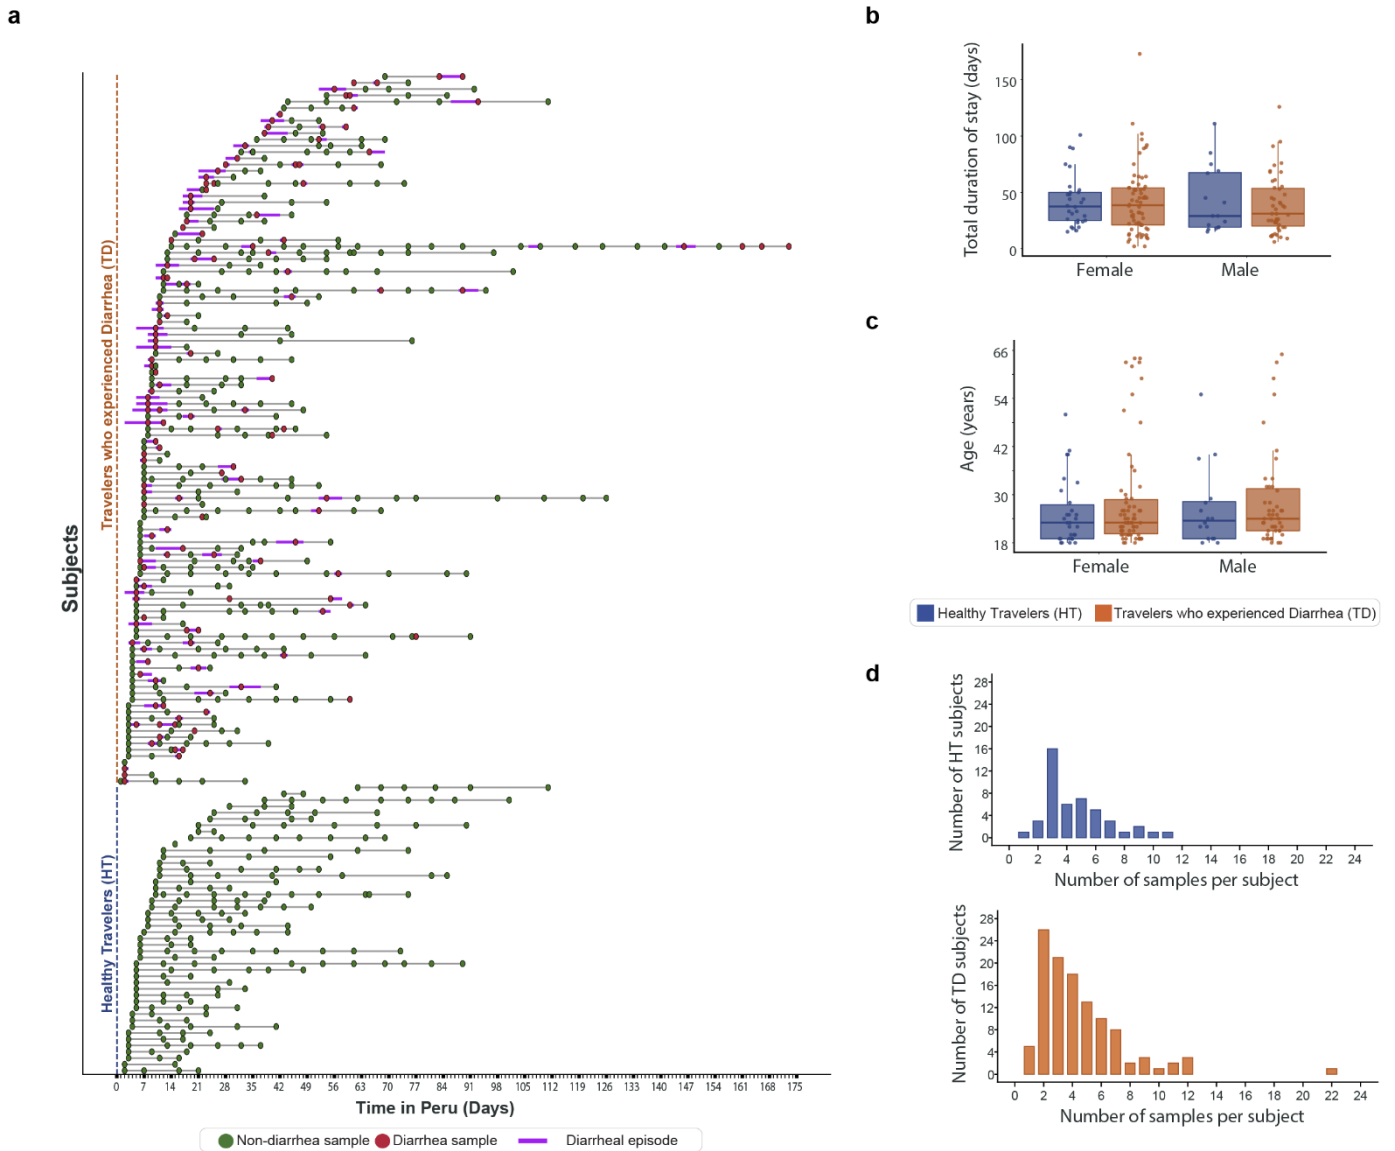

**Supplementary Fig. 1 a)** Timeline of sample collection and diarrheal episode among travelers with diarrhea (TD, top) and healthy travelers (HT, bottom). The non-diarrhea samples are represented in green and diarrhea samples are indicated in red with diarrhea duration indicated in pink color bars. **b-d)** Distribution of duration of stay, age, and number of processed samples per subject in HT and TD group (boxes show medians/quartiles; error bars extend to the most extreme values within 1.5 interquartile ranges).

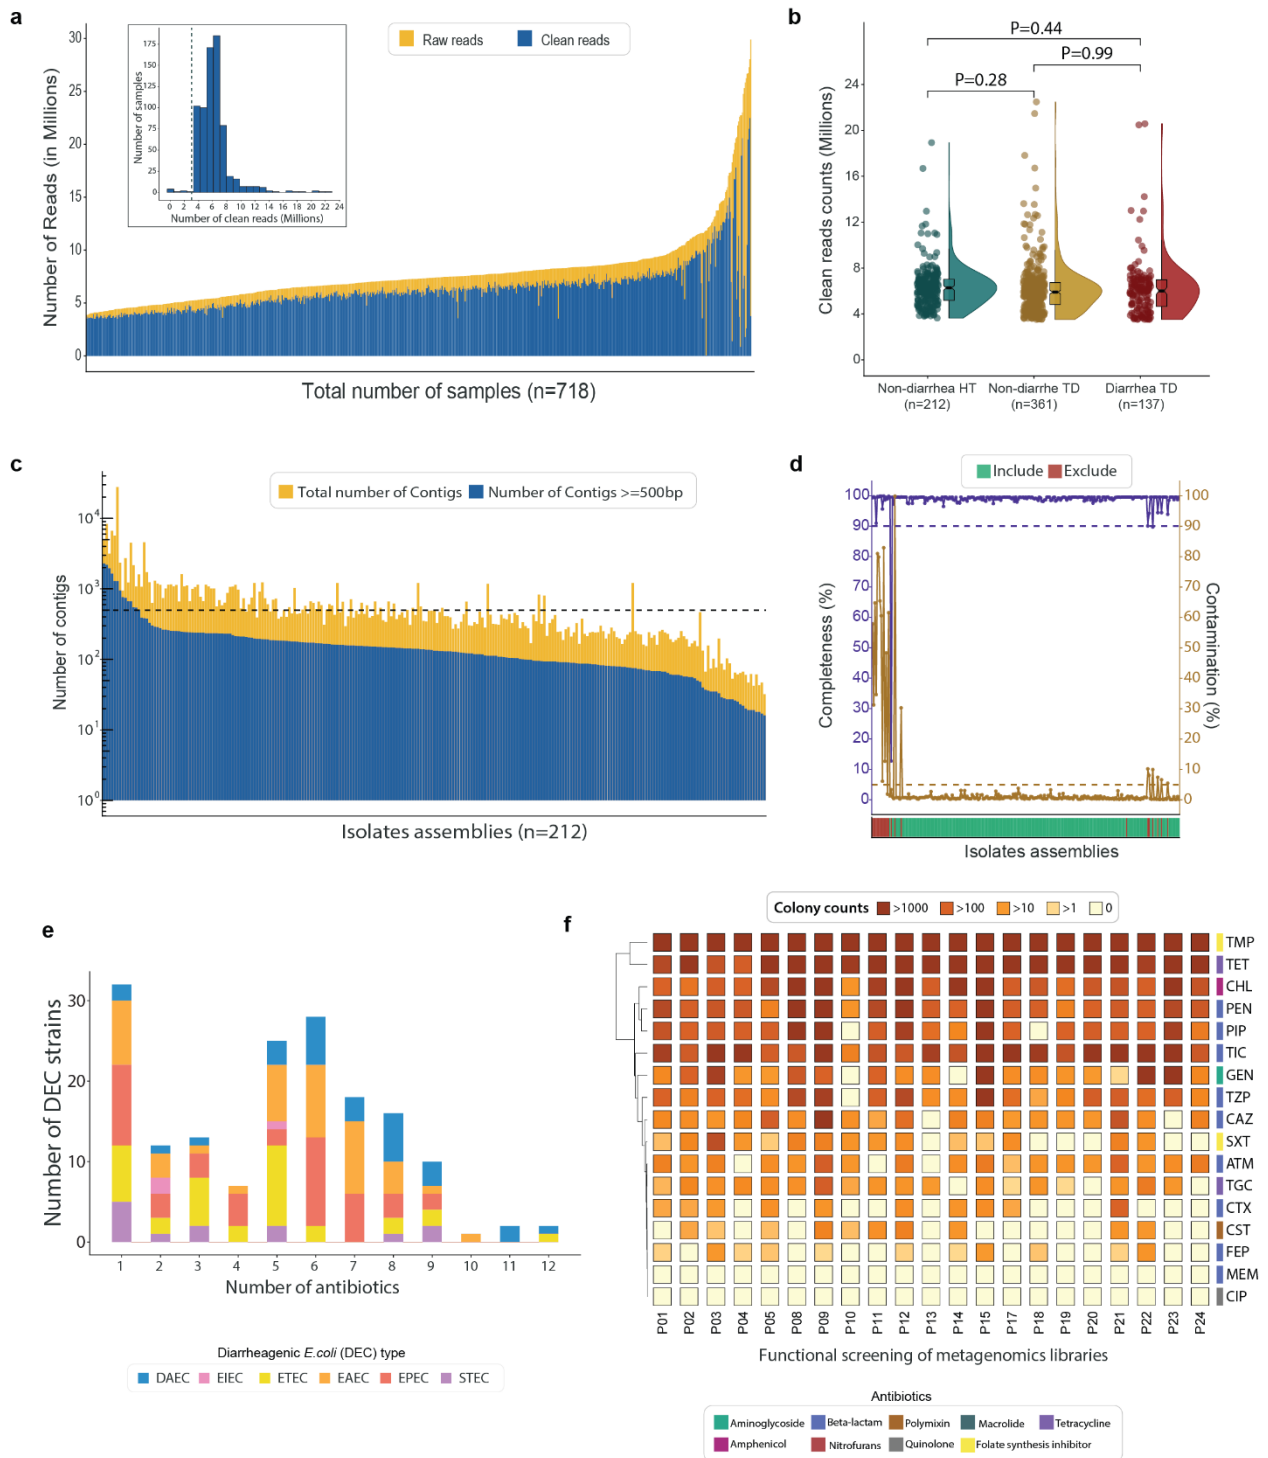

**Supplementary Fig. 2: Summary of shotgun metagenomics, isolates sequencing and functional metagenomics.** **a**) Distribution of unprocessed (yellow) and quality-filtered trimmed reads (blue) in metagenomics samples (n=718). (inset) Distribution of cleaned reads (in millions) where samples with less than 3M cleaned reads were discarded. **b**) Pairwise comparison of cleaned read counts across sample types from HT and TD Subjects. Two-sided Student's t-test was used to check the differences between groups. Boxes show medians/quartiles; error bars extend to the most extreme values within 1.5 interquartile ranges. **c**) Total number of contigs in each isolate assembly (highlighted in yellow) and the filtered contigs with length greater than 500bp (highlighted in blue). **d**) Line plot depicting the completeness and contamination of isolate assemblies. Isolate assemblies with > 90% completeness and < 5% contamination were included in the analysis (represented by green bar on x-axis) while the remaining were excluded (red bar on the x-axis). **e**) Distribution of number of antibiotics towards which diarrheagenic *E. coli* (DEC) isolates were phenotypically resistant. **f**) Heatmap of the number of colonies observed during screening of functional metagenomics libraries (n=21) against 17 antibiotics.

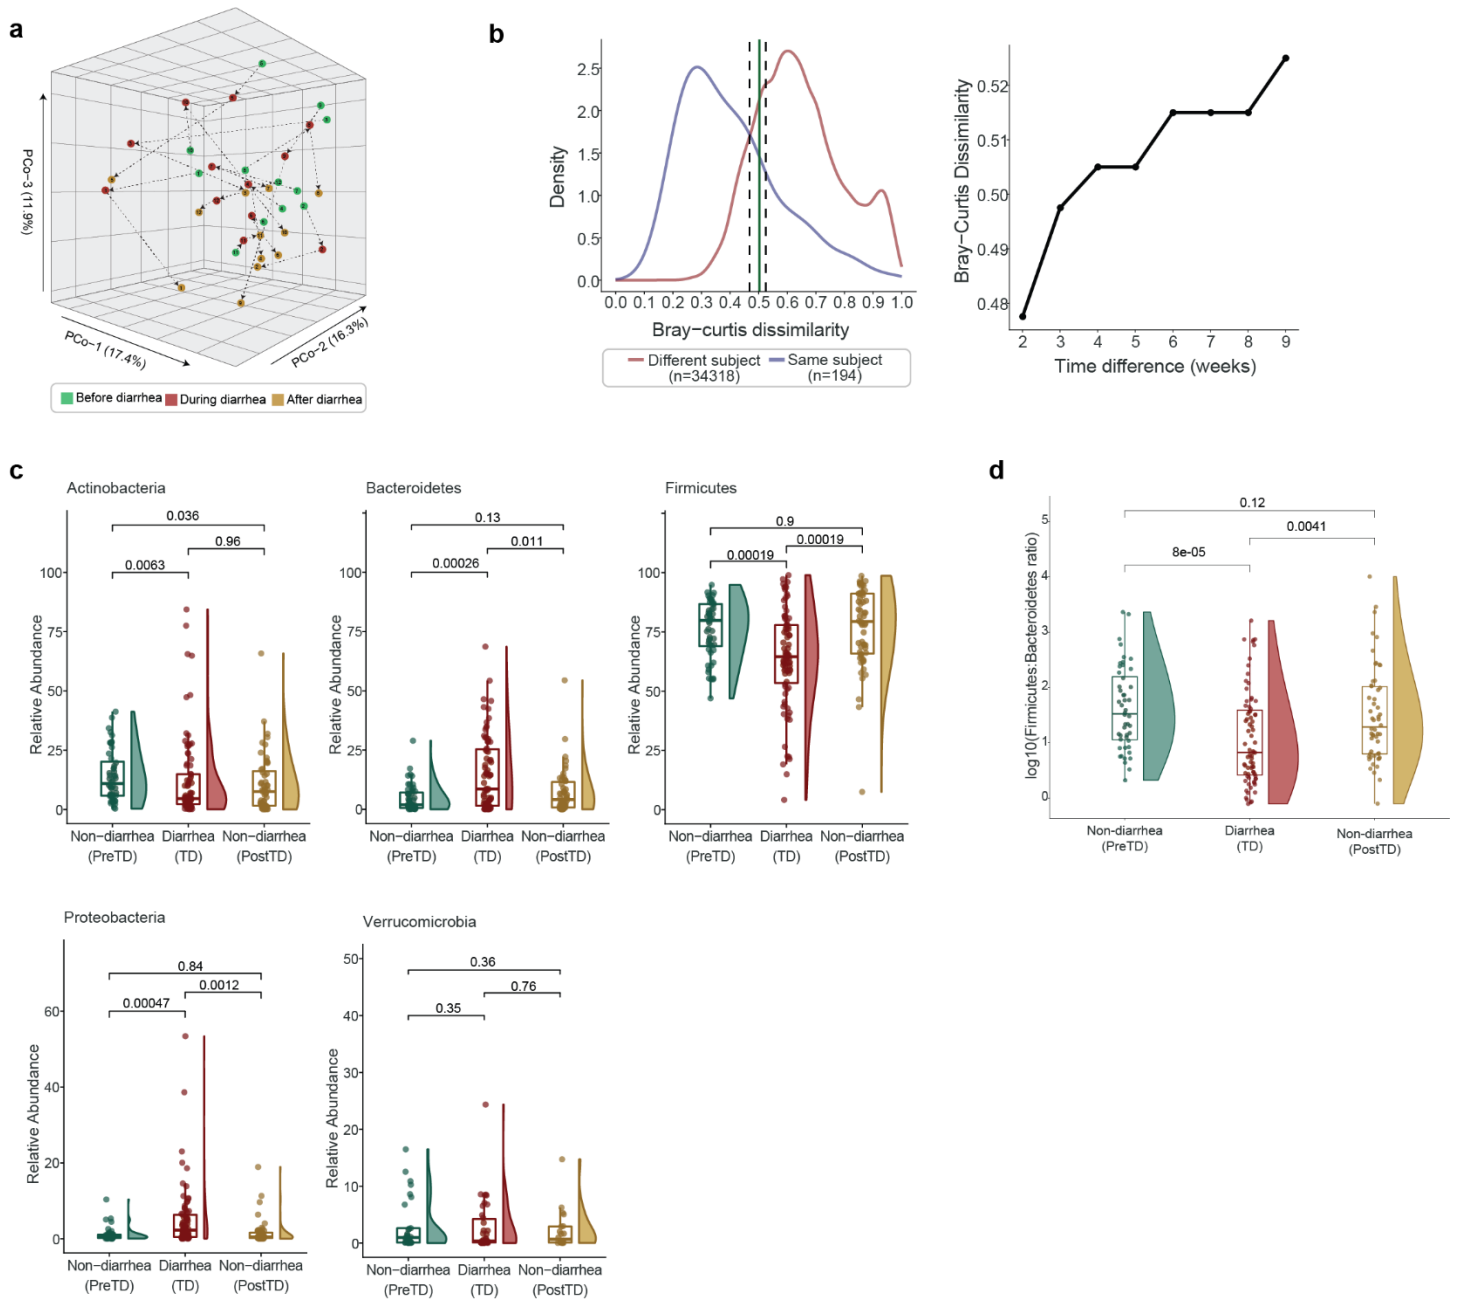

**Supplementary Fig. 3: a)** Principal Component Analysis (PCA) of subject-matched samples collected before, during, and after diarrheal episodes. Dotted lines connect samples from the same subject. **b)** Distribution of Bray-Curtis dissimilarity between consecutive samples from the same subject (represented by blue curve) versus those from different individuals (represented by red curve), with “microbiome shift events” defined as the Bray-Curtis threshold  $> 0.52$  (represented by green line). **c)** Relative abundance of five major phyla in before, during, and after diarrheal samples (two-sided Wilcoxon test,  $n = 171$  biologically independent samples). **d)** Distribution of  $\log_{10}$  (Firmicutes:Bacteroidetes ratio) in before, during, and after diarrheal samples (two-sided Wilcoxon test,  $n = 171$  biologically independent samples). Boxes show medians/quartiles; error bars extend to the most extreme values within 1.5 interquartile ranges.

### Actinobacteria

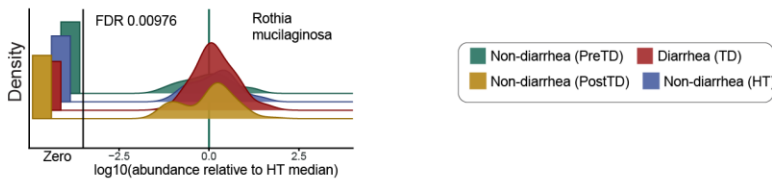

### Bacteroidetes

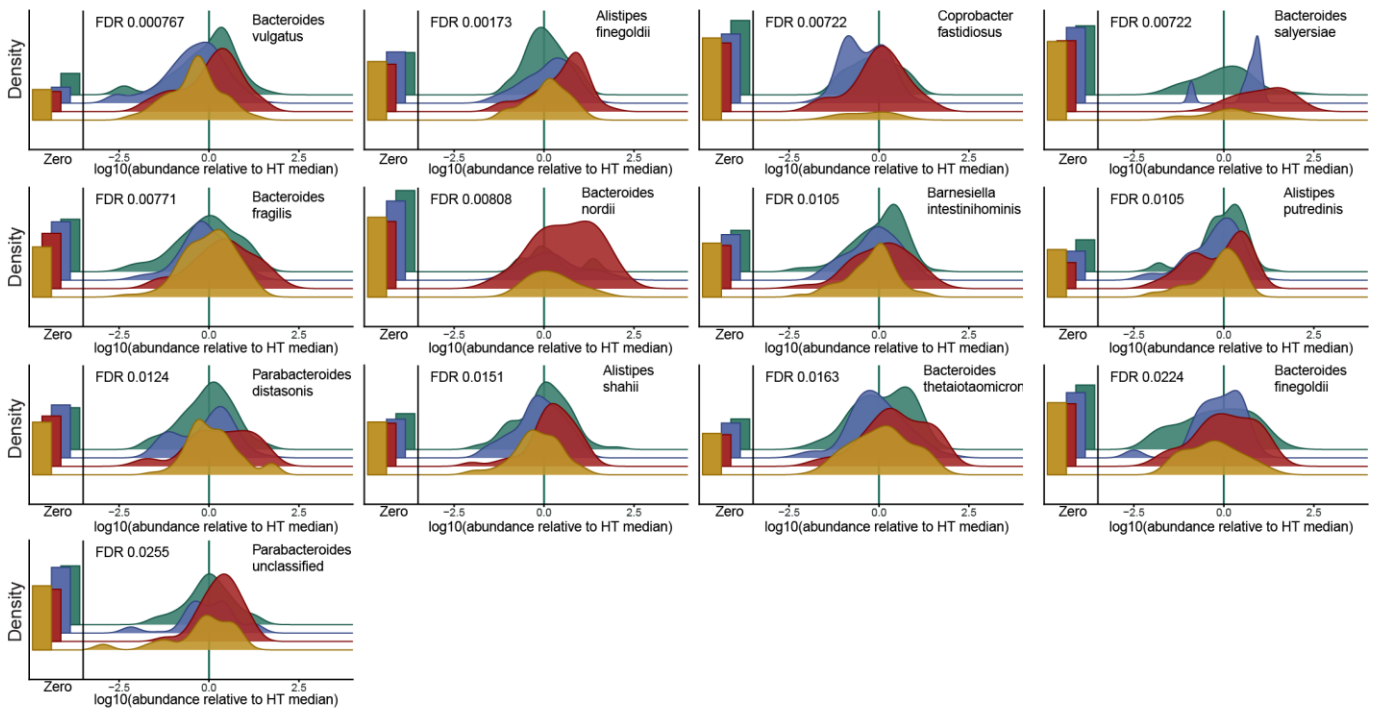

### Firmicutes

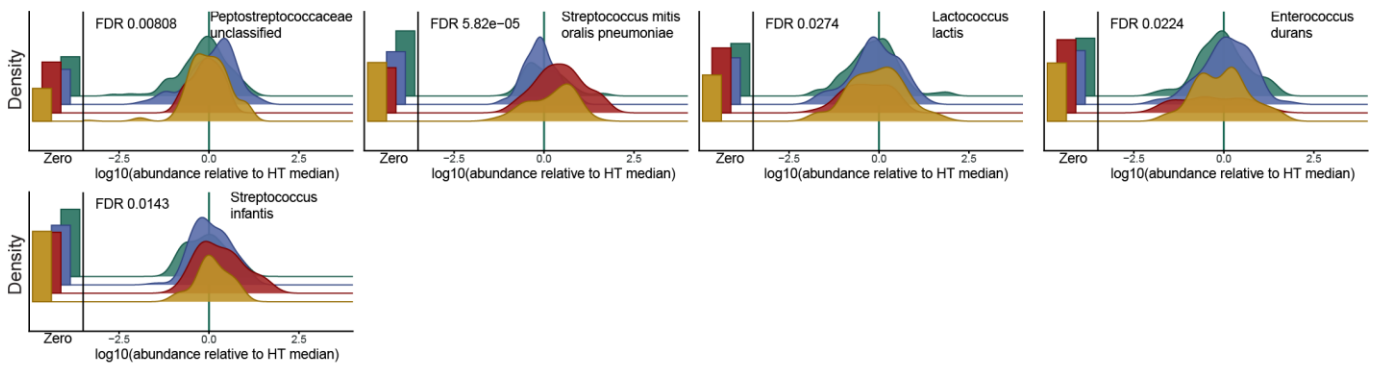

### Proteobacteria

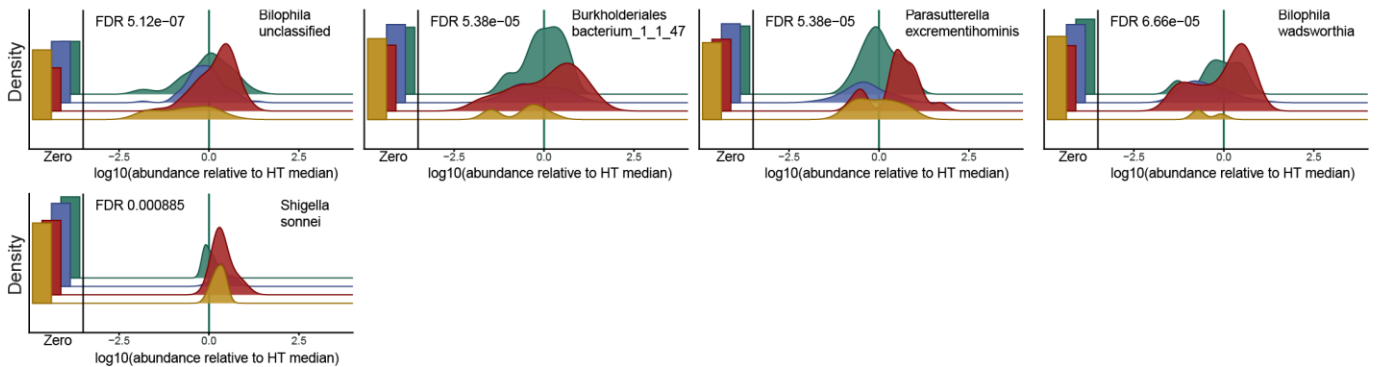

**Supplementary Fig.4:** Relative abundance distribution of differentially abundant species belonging to four phyla, normalized by the median relative abundance of non-diarrheal HT samples. Left barplot, fraction of samples below detection limit.

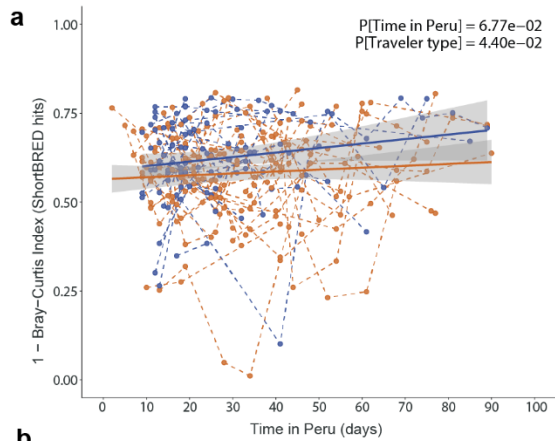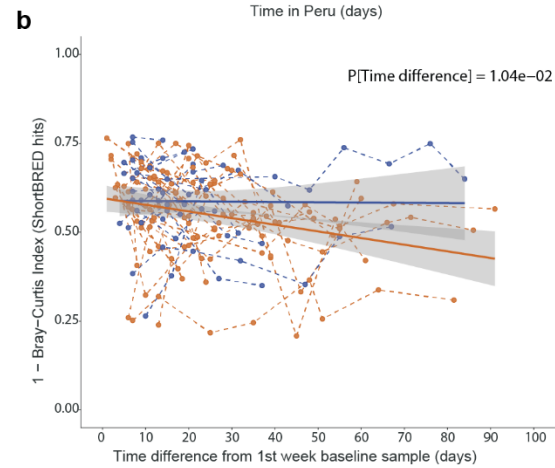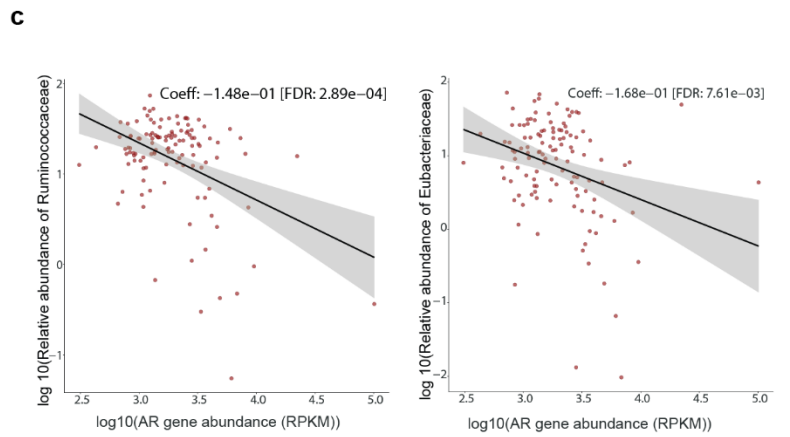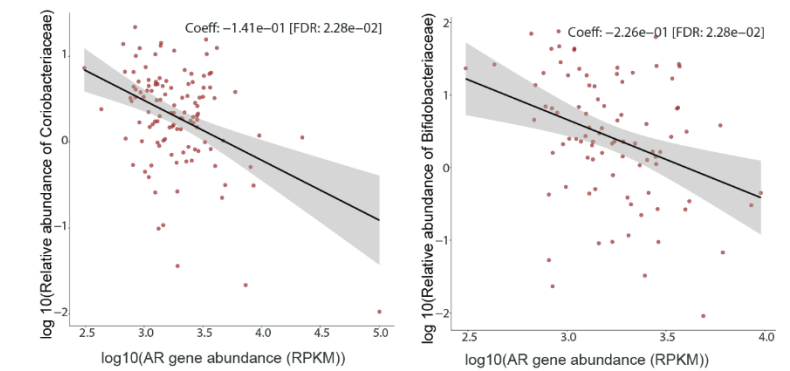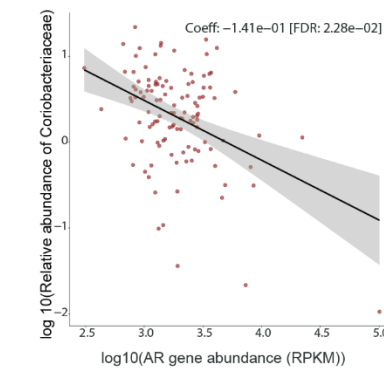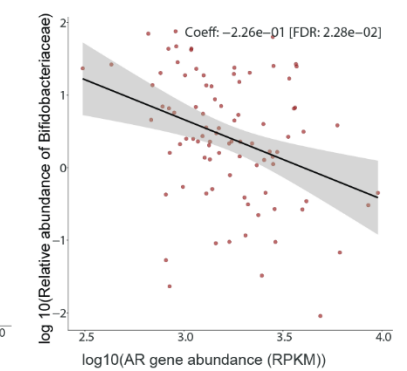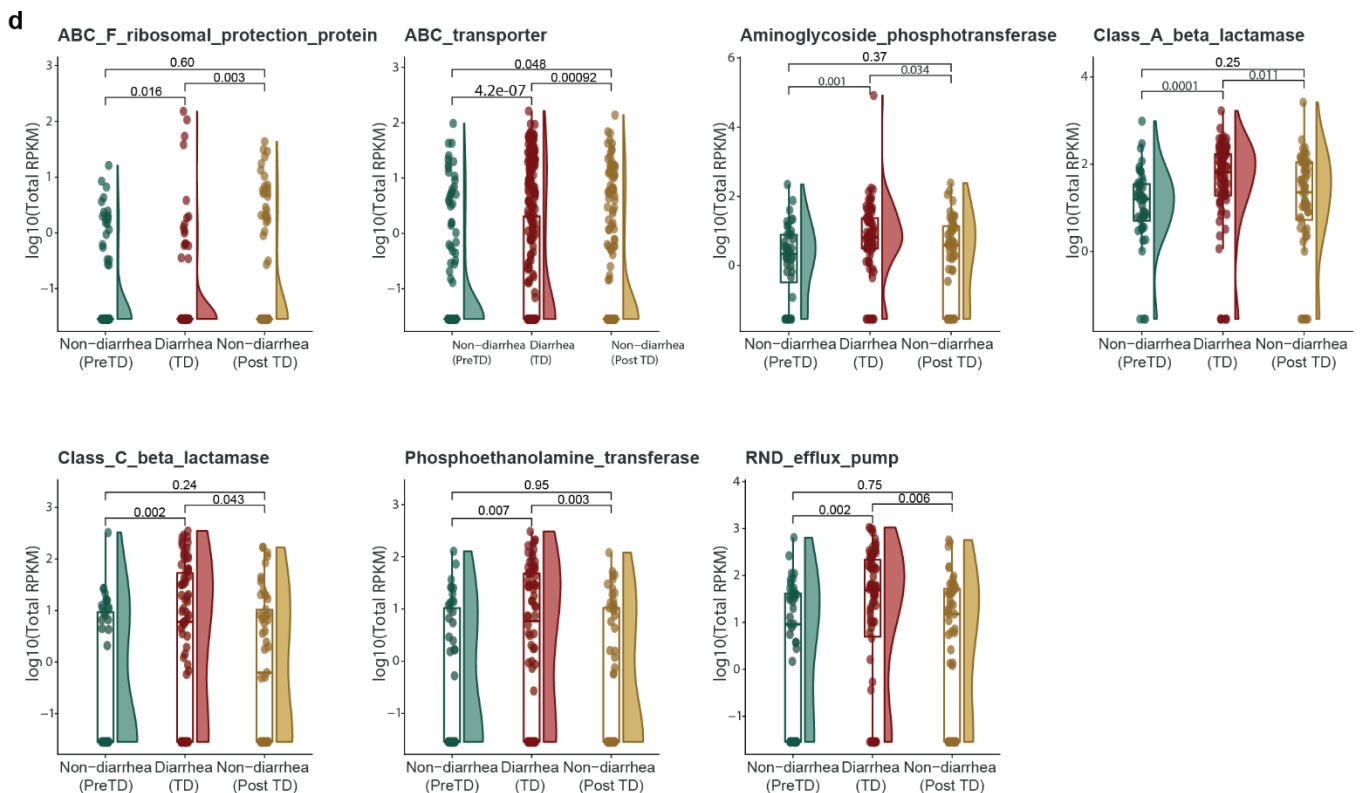

**Supplementary Fig. 5: a)** 1-Bray-Curtis dissimilarities of ARG compositions between consecutive samples from each subject, plotted throughout the length of their time in Peru with dotted lines connecting samples from the same subject. Points are individual fecal samples, colored by sample type (i.e diarrhea or non-diarrhea). Solid lines show the best fit from different traveler types: HT (blue) and TD (orange) (n=290, LMM,  $P > 0.05$ ) and the gray shading represents the 95% confidence interval (CI). **b)** Bray-Curtis dissimilarities between each subjects' samples and their 1st-week baseline sample. Points are individual fecal samples, colored by sample type (i.e. diarrhea or non-diarrhea), with dotted lines connecting samples from the same subject. Solid lines shows best fit with 95% CI of samples from different traveler types: HT (blue) and TD (orange) (n=189, LMM  $P[\text{Time difference}] < 0.05$ ). **c)** Increasing ARG abundance was associated with a decrease in microbial diversity (at the species level) of Ruminococcaceae, Eubacteriaceae, Coriobacteriaceae, and Bifidobacteriaceae. The significant associations were detected by MaAsLin2 where other metadata variables (age, sex, sample type, region, length of stay and antibiotics usage) were used as fixed effects. Solid lines shows best fit with gray shading representing 95% CI. The significant associations were corrected for multiple hypothesis testing using Benjamini-Hochberg method. **d)** ARG families with significant change in cumulative abundance (RPKM in log<sub>10</sub> scale) during diarrheal episodes. Two-sided Wilcoxon test was used to check the differences between the groups (n=171 biologically independent samples). P-values are multiple hypothesis test corrected using Benjamini-Hochberg (FDR) method. Boxes show medians/quartiles; error bars extend to the most extreme values within 1.5 interquartile ranges.

### Antibiotic efflux pumps

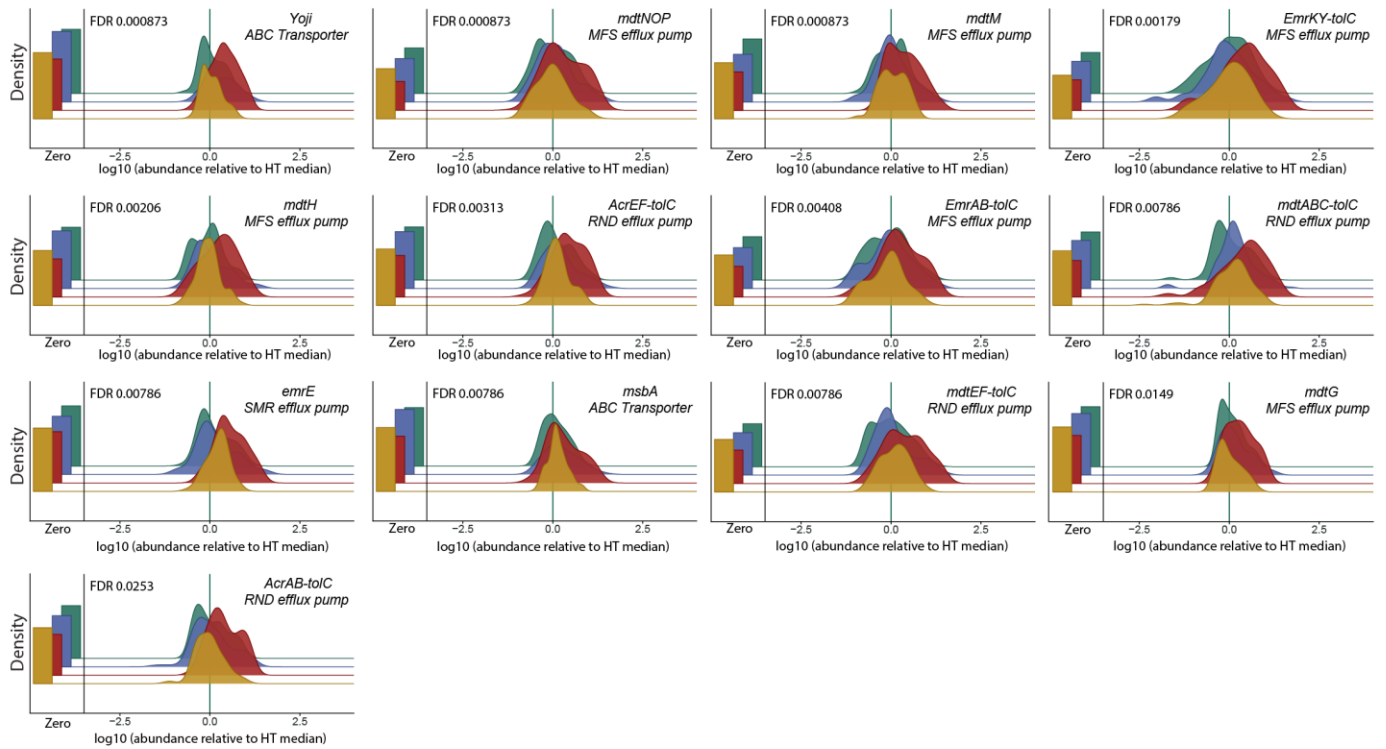

### Antibiotic inactivation

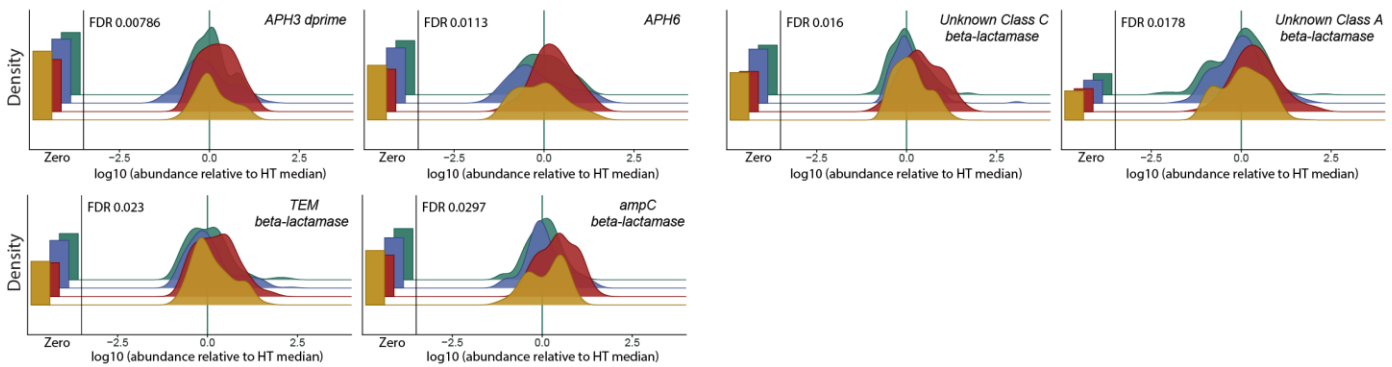

### Antibiotic target alteration

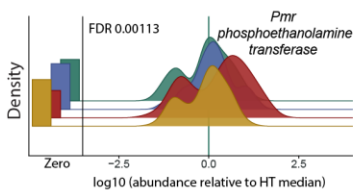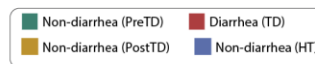

### Antibiotic target protection

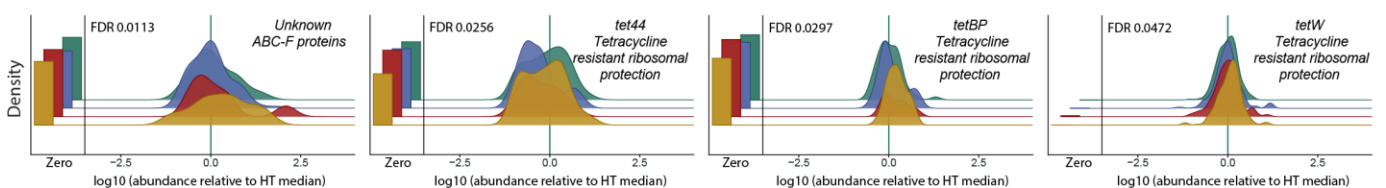

Supplementary Fig. 6: Relative abundance distribution of differentially abundant ARGs belonging to 4 resistance mechanisms, normalized by the median relative abundance of non-diarrheal HT samples. Left barplot, fraction of samples below detection limit.



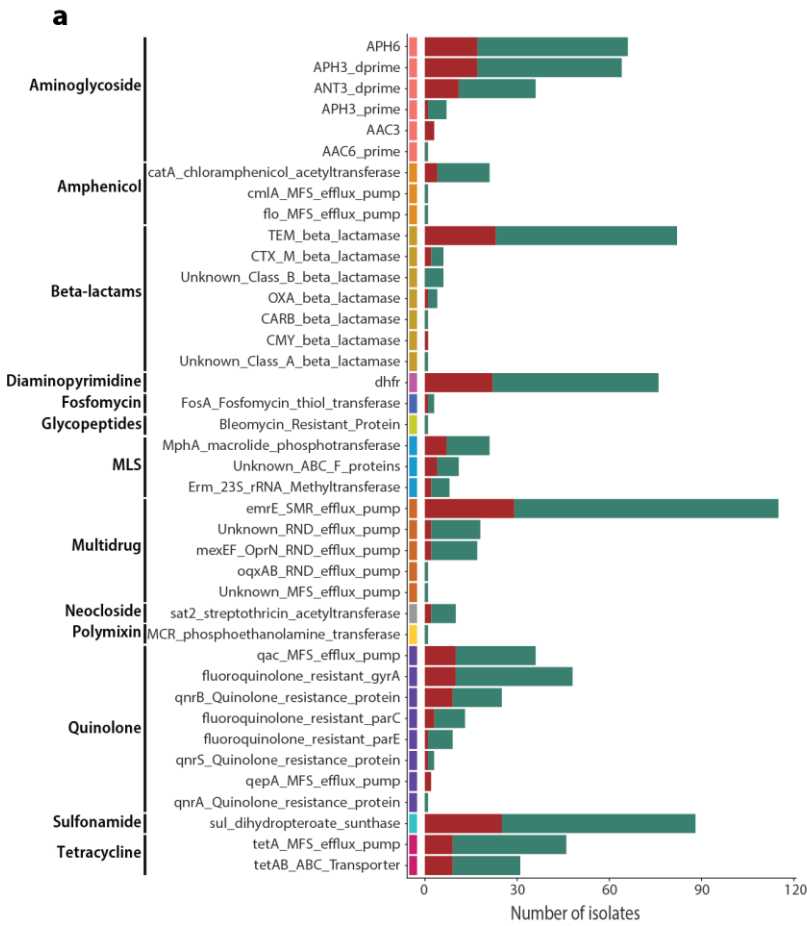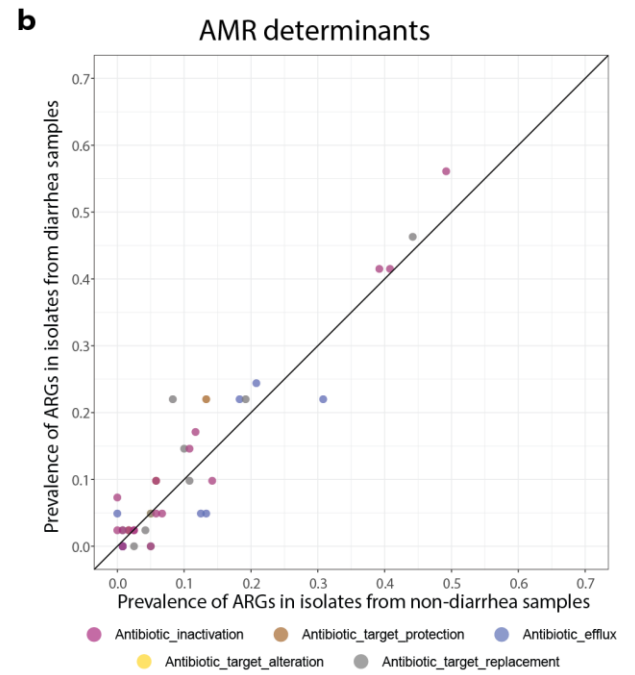

**Supplementary Fig. 7: a)** The frequency of antibiotic resistance gene families identified in the genomes of DEC strains isolated from non-diarrheal (green) and diarrheal (red) sample types. **b)** Prevalence of antibiotic resistance genes in DEC isolates from diarrheal or non-diarrheal samples.

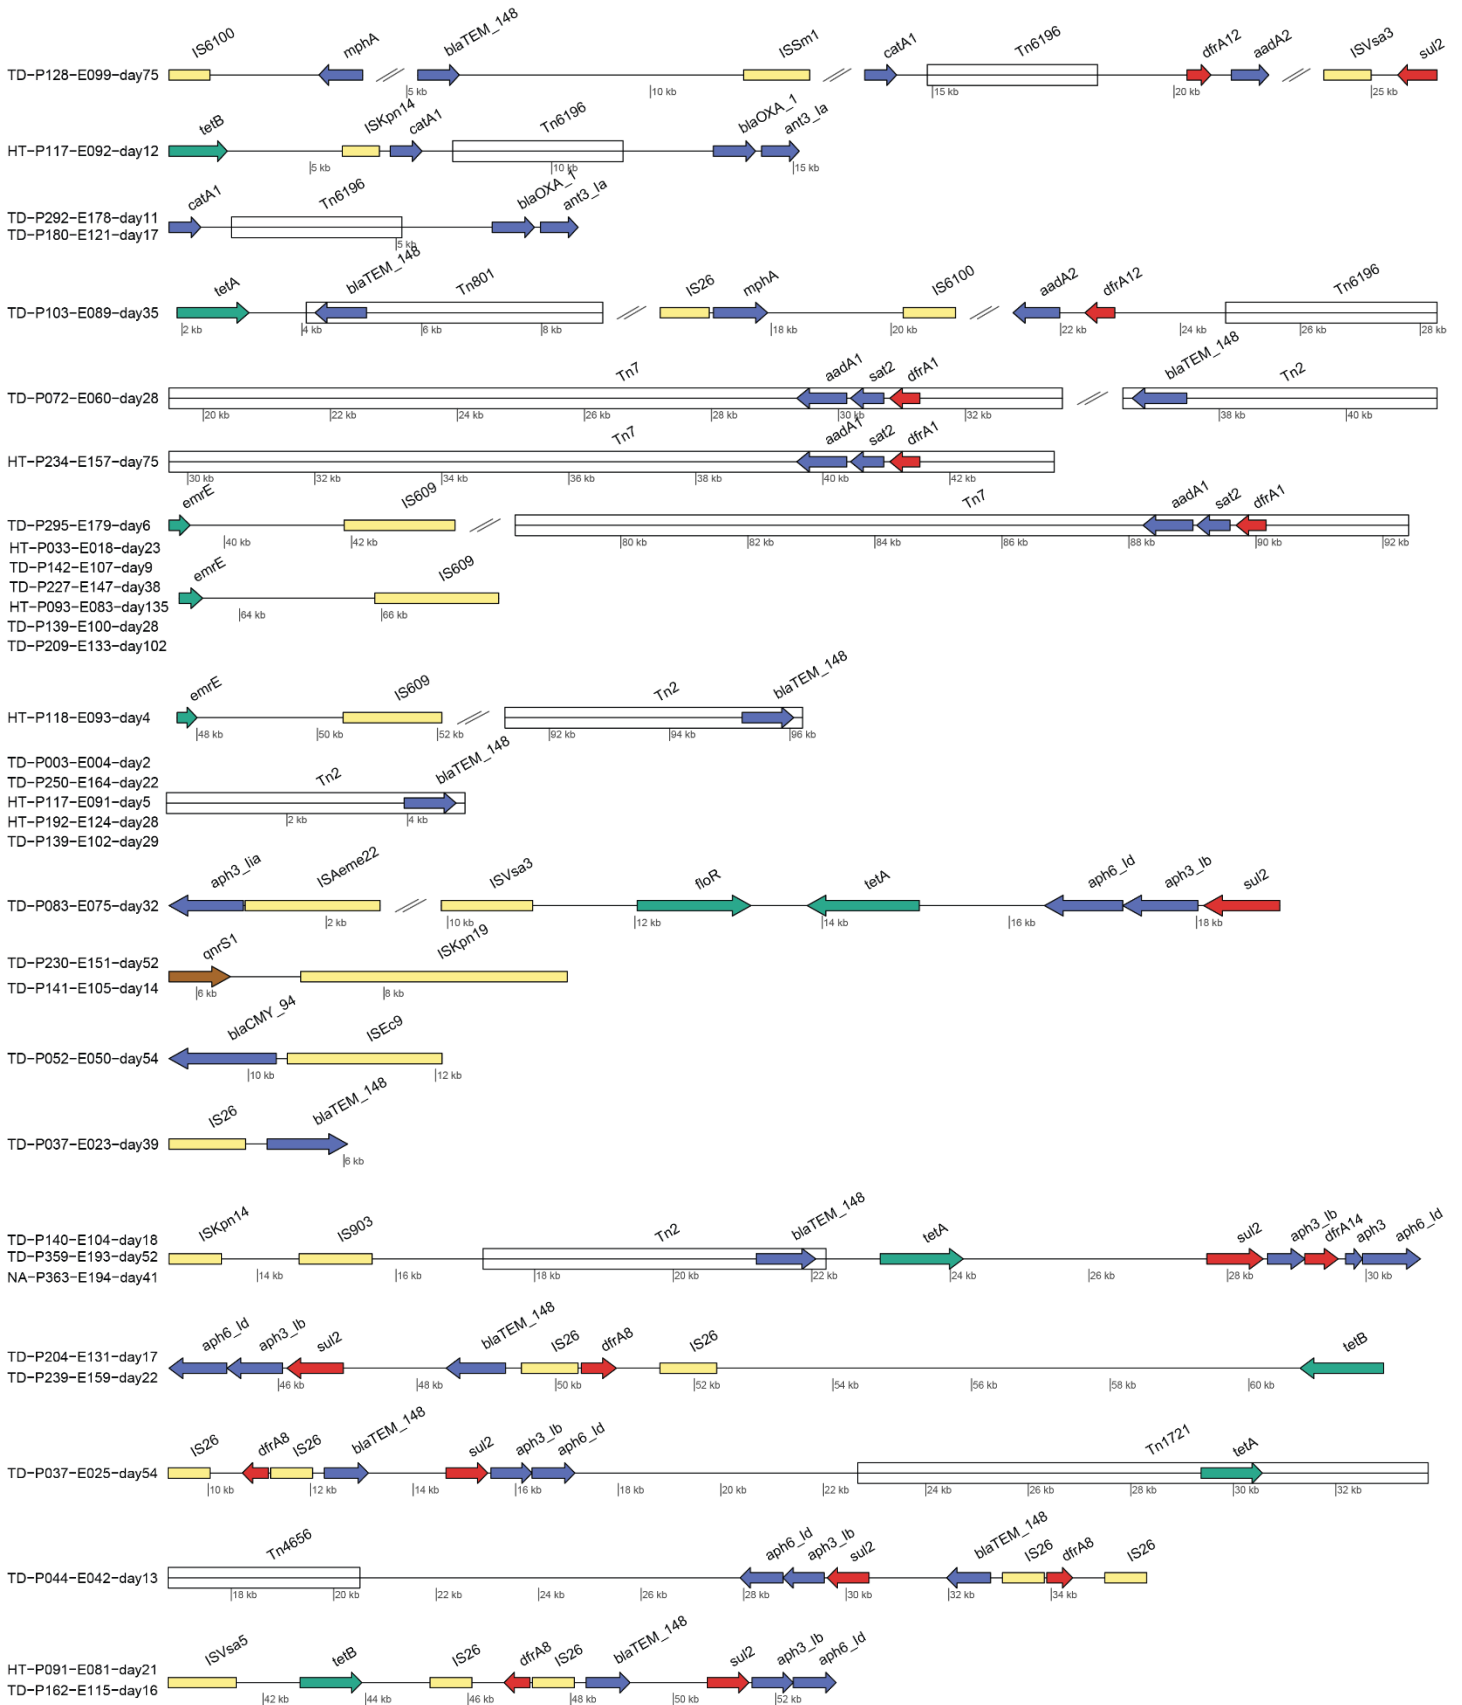

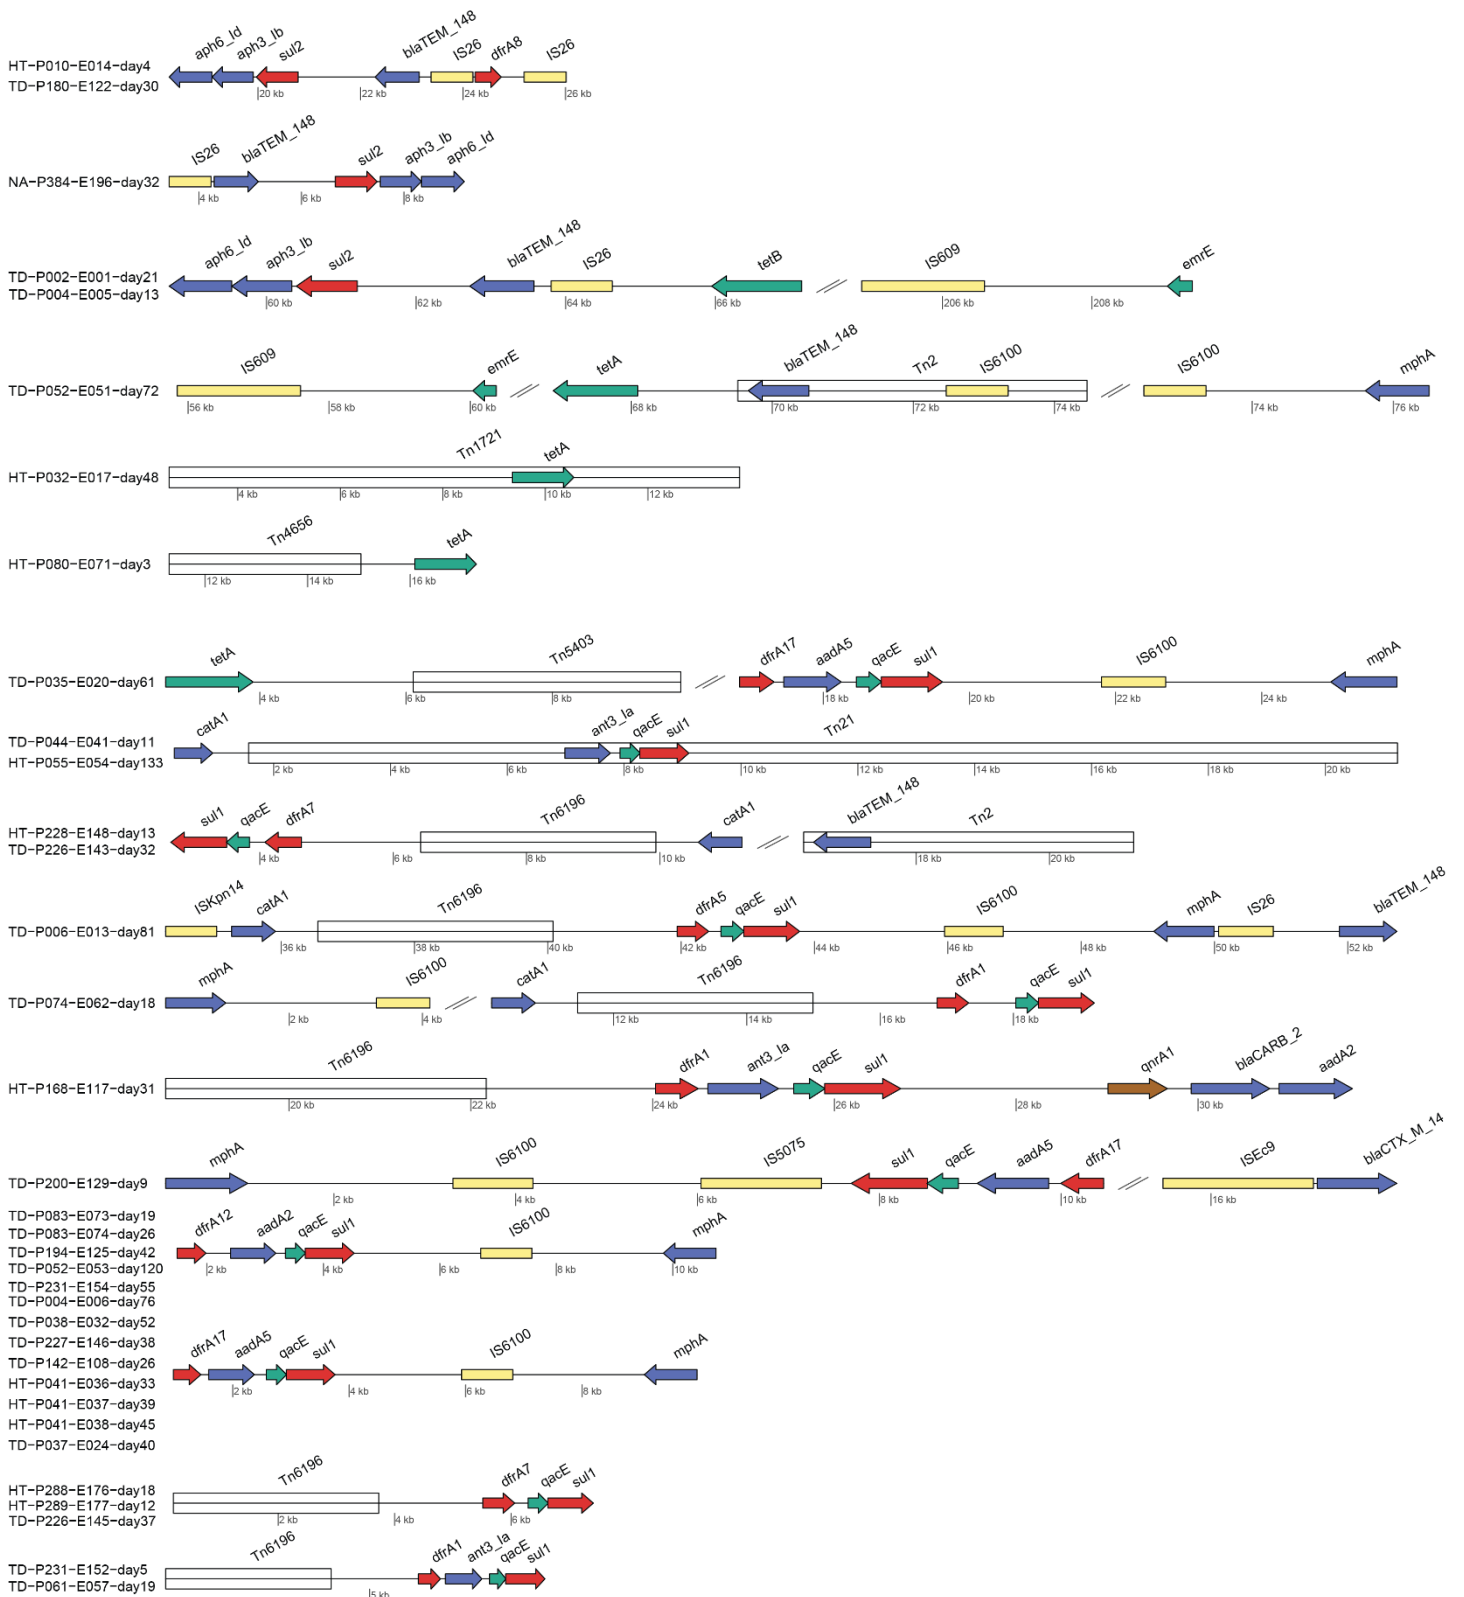

**Supplementary Fig. 8:** Examples of arrangement of ARGs and mobile elements identified on the same contigs from isolates.

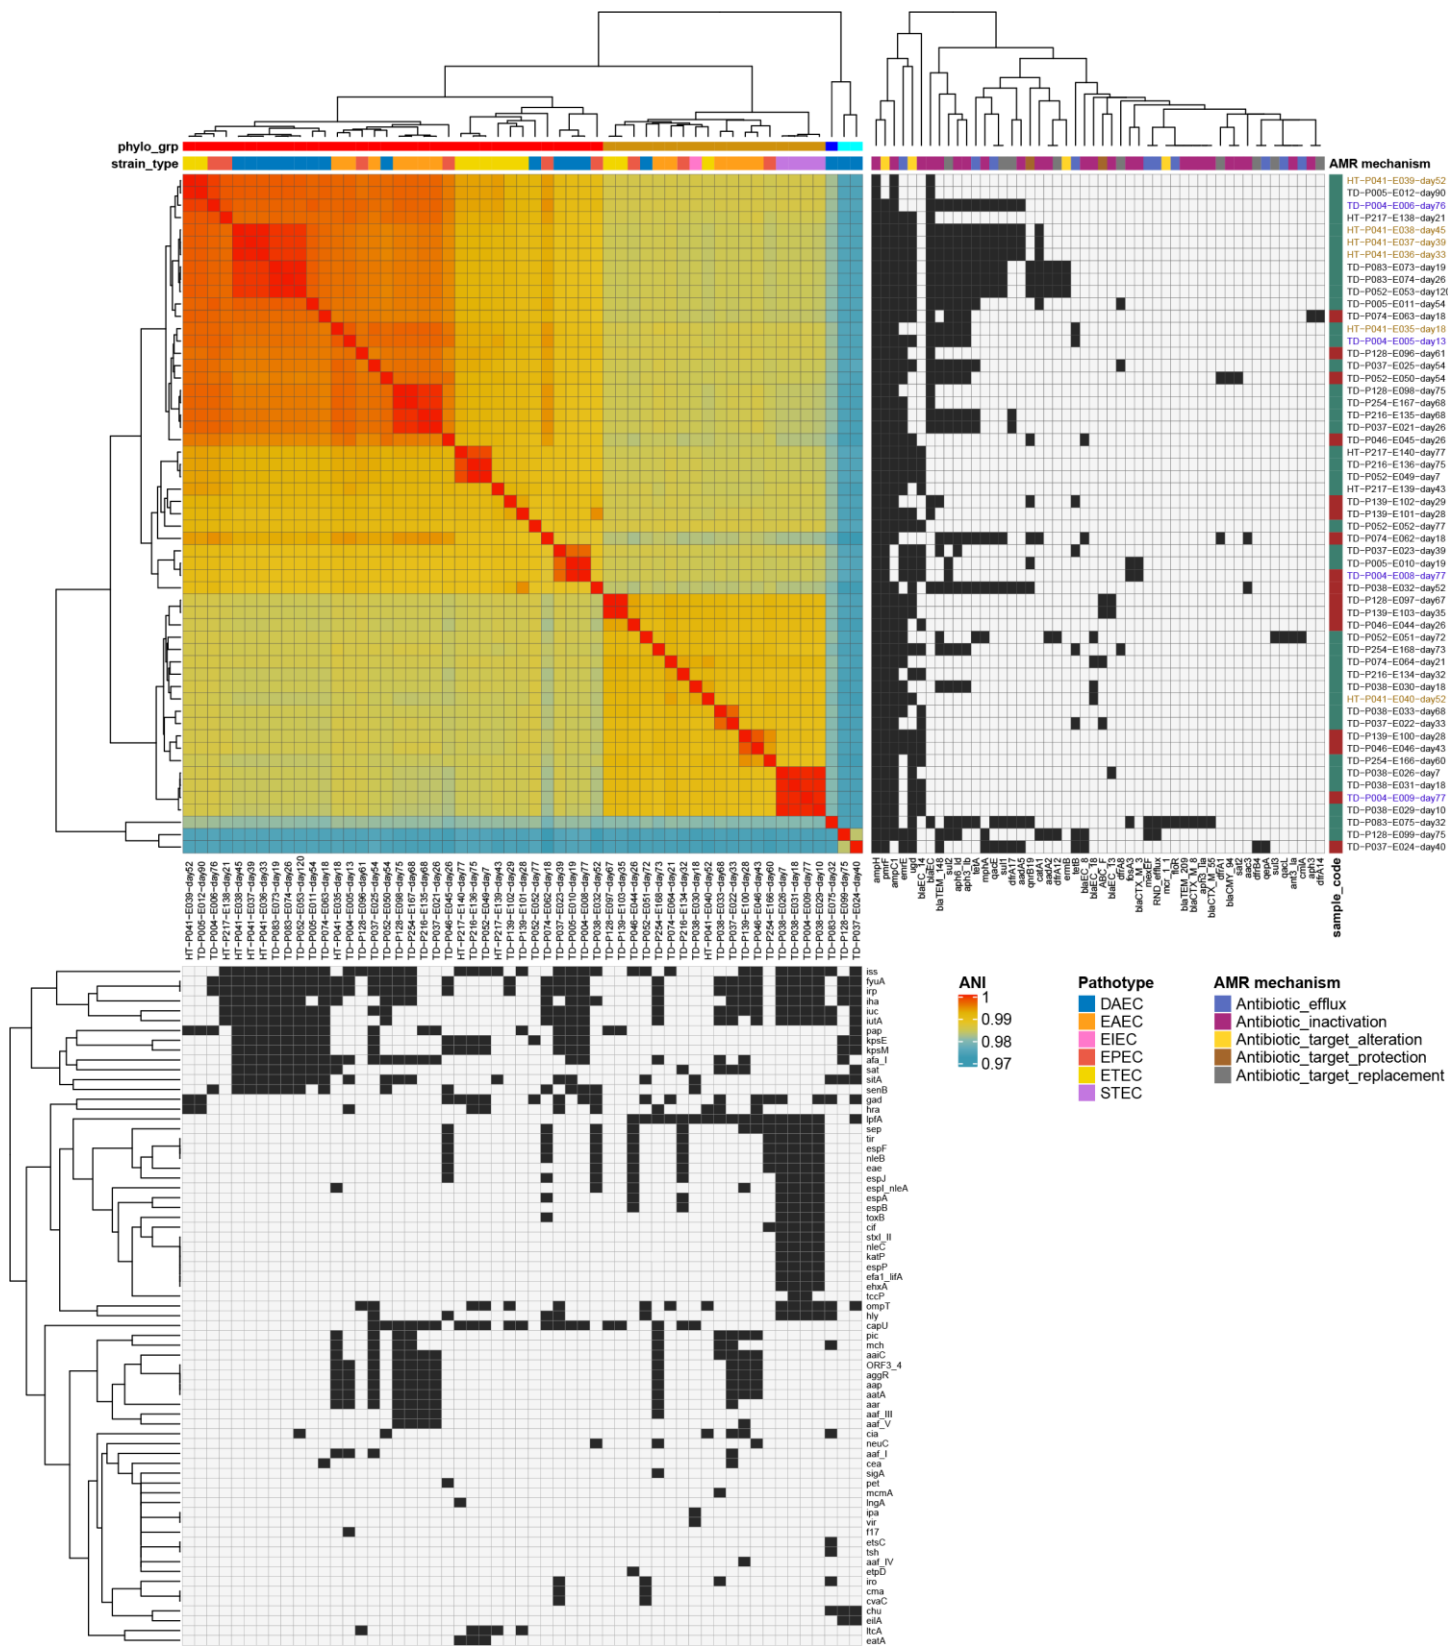

**Supplementary Fig. 9:** Relatedness of DEC isolates assessed by Strainsifter (top left phylogenetic tree) and average nucleotide identity (ANI; left heatmap). Grayscale binary heatmap shows the presence/absence of antibiotic resistance genes (top right) and virulence factors (bottom left). Side bars depicting phylo group, strain type, AMR mechanism and sample type. For emphasis, the font of isolates from subjects TD-P004 and HT-P041 (mentioned in text) are colored purple and gold, respectively.

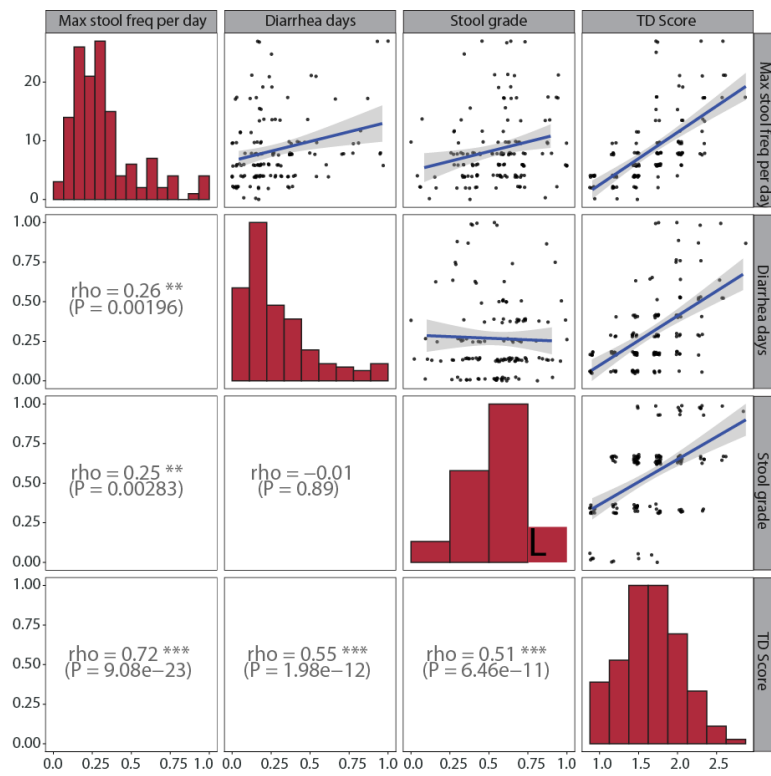

**Supplementary Figure 10:** Comparison of TD Score with Stool frequency, Stool consistency and Diarrhea duration.

## Supplementary Tables

| Supplementary Table 1: Description of the participants and the risk factors associated with TD |            |               |             |              |      |            |         |
|------------------------------------------------------------------------------------------------|------------|---------------|-------------|--------------|------|------------|---------|
| Characteristics                                                                                | Total Obs. | All (N = 159) | HT (N = 46) | TD (N = 113) | OR   | 95% CI     | P-value |
| <b>Demographic factors</b>                                                                     |            |               |             |              |      |            |         |
| <b>Sex</b>                                                                                     | 159        |               |             |              |      |            |         |
| Female                                                                                         |            | 96 (60%)      | 30 (65%)    | 66 (58%)     | ---  | ---        |         |
| Male                                                                                           |            | 63 (40%)      | 16 (35%)    | 47 (42%)     | 1.34 | 0.66, 2.77 | 0.427   |
| <b>Age</b>                                                                                     | 159        | 24 (20, 29)   | 23 (19, 28) | 24 (21, 29)  | 1.02 | 0.99, 1.06 | 0.214   |
| <b>Lodging in cusco</b>                                                                        | 157        |               |             |              |      |            |         |
| Other                                                                                          |            | 14 (8.9%)     | 4 (8.9%)    | 10 (8.9%)    | ---  | ---        |         |
| Host Family                                                                                    |            | 52 (33%)      | 16 (36%)    | 36 (32%)     | 0.9  | 0.22, 3.15 | 0.874   |
| School Lodging                                                                                 |            | 91 (58%)      | 25 (56%)    | 66 (59%)     | 1.06 | 0.27, 3.48 | 0.932   |
| Missing                                                                                        |            | 2             | 1           | 1            |      |            |         |
| <b>Country</b>                                                                                 | 159        |               |             |              |      |            |         |
| Others†                                                                                        |            | 25 (16%)      | 7 (15%)     | 18 (16%)     | ---  | ---        |         |
| Canada                                                                                         |            | 10 (6.3%)     | 4 (8.7%)    | 6 (5.3%)     | 0.58 | 0.12, 2.86 | 0.492   |
| Germany                                                                                        |            | 21 (13%)      | 8 (17%)     | 13 (12%)     | 0.63 | 0.18, 2.19 | 0.468   |
| Netherlands                                                                                    |            | 17 (11%)      | 4 (8.7%)    | 13 (12%)     | 1.26 | 0.31, 5.67 | 0.747   |
| Switzerland                                                                                    |            | 19 (12%)      | 7 (15%)     | 12 (11%)     | 0.67 | 0.18, 2.41 | 0.534   |
| United Kingdom                                                                                 |            | 14 (8.8%)     | 3 (6.5%)    | 11 (9.7%)    | 1.43 | 0.32, 7.69 | 0.653   |
| United States                                                                                  |            | 53 (33%)      | 13 (28%)    | 40 (35%)     | 1.2  | 0.39, 3.45 | 0.743   |
| <b>Previous travel to developing country</b>                                                   | 158        |               |             |              | 1.13 | 0.54, 2.42 | 0.751   |
| No                                                                                             |            | 107 (68%)     | 32 (70%)    | 75 (67%)     |      |            |         |
| Yes                                                                                            |            | 51 (32%)      | 14 (30%)    | 37 (33%)     |      |            |         |
| Missing                                                                                        |            | 1             | 0           | 1            |      |            |         |
| <b>Previous travel in last 1 year</b>                                                          | 159        |               |             |              | 0.8  | 0.35, 1.72 | 0.571   |
| No                                                                                             |            | 43 (27%)      | 11 (24%)    | 32 (28%)     |      |            |         |
| Yes                                                                                            |            | 116 (73%)     | 35 (76%)    | 81 (72%)     |      |            |         |
| <b>Total trip duration (days)</b>                                                              | 159        | 35 (21, 54)   | 35 (23, 52) | 35 (21, 54)  | 1    | 0.99, 1.01 | 0.712   |
| <b>Preventative measures</b>                                                                   |            |               |             |              |      |            |         |
| <b>Typhoid vaccine</b>                                                                         | 159        |               |             |              | 0.73 | 0.35, 1.49 | 0.396   |
| No                                                                                             |            | 60 (38%)      | 15 (33%)    | 45 (40%)     |      |            |         |
| Yes                                                                                            |            | 99 (62%)      | 31 (67%)    | 68 (60%)     |      |            |         |
| <b>HepatitisA vaccine</b>                                                                      | 144        |               |             |              | 0.44 | 0.07, 1.78 | 0.308   |
| No                                                                                             |            | 12 (8.3%)     | 2 (4.7%)    | 10 (9.9%)    |      |            |         |
| Yes                                                                                            |            | 132 (92%)     | 41 (95%)    | 91 (90%)     |      |            |         |
| Missing                                                                                        |            | 15            | 3           | 12           |      |            |         |
| <b>Cholera vaccine</b>                                                                         | 106        |               |             |              | 2.82 | 0.96, 10.4 | 0.08    |
| No                                                                                             |            | 79 (75%)      | 26 (87%)    | 53 (70%)     |      |            |         |
| Yes                                                                                            |            | 27 (25%)      | 4 (13%)     | 23 (30%)     |      |            |         |
| Missing                                                                                        |            | 53            | 16          | 37           |      |            |         |
| <b>Received any preventative medicine info</b>                                                 | 159        |               |             |              | 1.13 | 0.45, 2.65 | 0.782   |
| No                                                                                             |            | 29 (18%)      | 9 (20%)     | 20 (18%)     |      |            |         |

|                                                                      |     |           |          |           |      |            |       |
|----------------------------------------------------------------------|-----|-----------|----------|-----------|------|------------|-------|
| Yes                                                                  |     | 130 (82%) | 37 (80%) | 93 (82%)  |      |            |       |
| <b>Health history</b>                                                |     |           |          |           |      |            |       |
| <b>Pre-existing bowel disease†</b>                                   | 159 |           |          |           | 1.55 | 0.46, 7.08 | 0.52  |
| No                                                                   |     | 145 (91%) | 43 (93%) | 102 (90%) |      |            |       |
| Yes                                                                  |     | 14 (8.8%) | 3 (6.5%) | 11 (9.7%) |      |            |       |
| <b>GERD or Dyspepsia†</b>                                            | 159 |           |          |           | 4.17 | 1.14, 26.9 | 0.063 |
| No                                                                   |     | 139 (87%) | 44 (96%) | 95 (84%)  |      |            |       |
| Yes                                                                  |     | 20 (13%)  | 2 (4.3%) | 18 (16%)  |      |            |       |
| <b>Lactose intolerant</b>                                            | 159 |           |          |           | 0.44 | 0.14, 1.44 | 0.162 |
| No                                                                   |     | 146 (92%) | 40 (87%) | 106 (94%) |      |            |       |
| Yes                                                                  |     | 13 (8.2%) | 6 (13%)  | 7 (6.2%)  |      |            |       |
| <b>Other disease†</b>                                                | 159 |           |          |           | 1.86 | 0.57, 8.42 | 0.35  |
| No                                                                   |     | 143 (90%) | 43 (93%) | 100 (88%) |      |            |       |
| Yes                                                                  |     | 16 (10%)  | 3 (6.5%) | 13 (12%)  |      |            |       |
| <b>Diarrhea in last 2 weeks</b>                                      | 158 |           |          |           | 1.2  | 0.57, 2.62 | 0.632 |
| No                                                                   |     | 109 (69%) | 33 (72%) | 76 (68%)  |      |            |       |
| Yes                                                                  |     | 49 (31%)  | 13 (28%) | 36 (32%)  |      |            |       |
| Missing                                                              |     | 1         | 0        | 1         |      |            |       |
| <b>Medication in last 2 weeks for illness or prophylaxis</b>         | 158 |           |          |           | 0.37 | 0.11, 1.26 | 0.105 |
| No                                                                   |     | 147 (92%) | 40 (87%) | 107 (95%) |      |            |       |
| Antibiotic (Ciprofloxacin, Azithromycin, Tetracycline, Trimethoprim) |     | 6 (3.8%)  | 2 (4.4%) | 4 (3.5%)  | 0.75 | 0.14, 5.54 | 0.743 |
| Antidiarrheal (Loperamide hydrochloride)                             |     | 1 (0.6%)  | 1 (2.2%) | 0 (0%)    | 0    |            | 0.986 |
| Antimalarial (Doxycycline, Malarone)                                 |     | 4 (2.5%)  | 2 (4.4%) | 2 (1.8%)  | 0.37 | 0.04, 3.20 | 0.333 |
| Missing                                                              |     | 1         | 1        | 0         |      |            |       |
| <b>Dietary habits at enrollment</b>                                  |     |           |          |           |      |            |       |
| <b>Raw fruits or vegetables</b>                                      | 159 |           |          |           | 0.89 | 0.54, 1.52 | 0.668 |
| Rarely or Never                                                      |     | 107 (67%) | 30 (65%) | 77 (68%)  |      |            |       |
| Sometimes                                                            |     | 37 (23%)  | 11 (24%) | 26 (23%)  |      |            |       |
| Almost Always or Always                                              |     | 15 (9.4%) | 5 (11%)  | 10 (8.8%) |      |            |       |
| <b>Tap water or unbottled beverages</b>                              | 159 |           |          |           | 0.78 | 0.42, 1.48 | 0.418 |
| Rarely or Never                                                      |     | 135 (85%) | 36 (78%) | 99 (88%)  |      |            |       |
| Sometimes                                                            |     | 15 (9.4%) | 8 (17%)  | 7 (6.2%)  |      |            |       |
| Almost Always or Always                                              |     | 9 (5.7%)  | 2 (4.3%) | 7 (6.2%)  |      |            |       |
| <b>Under cooked meat</b>                                             | 159 |           |          |           | 0.93 | 0.48, 1.90 | 0.844 |
| Rarely or Never                                                      |     | 120 (75%) | 34 (74%) | 86 (76%)  |      |            |       |
| Sometimes                                                            |     | 35 (22%)  | 11 (24%) | 24 (21%)  |      |            |       |
| Almost Always or Always                                              |     | 4 (2.5%)  | 1 (2.2%) | 3 (2.7%)  |      |            |       |
| <b>Add sauces to food</b>                                            | 159 |           |          |           | 1.25 | 0.76, 2.08 | 0.372 |
| Rarely or Never                                                      |     | 41 (26%)  | 16 (35%) | 25 (22%)  |      |            |       |
| Sometimes                                                            |     | 82 (52%)  | 19 (41%) | 63 (56%)  |      |            |       |
| Almost Always or Always                                              |     | 36 (23%)  | 11 (24%) | 25 (22%)  |      |            |       |
| <b>Wash hands before eating</b>                                      | 159 |           |          |           | 1.04 | 0.62, 1.69 | 0.886 |
| Rarely or Never                                                      |     | 18 (11%)  | 6 (13%)  | 12 (11%)  |      |            |       |
| Sometimes                                                            |     | 45 (28%)  | 12 (26%) | 33 (29%)  |      |            |       |
| Almost Always or Always                                              |     | 96 (60%)  | 28 (61%) | 68 (60%)  |      |            |       |
| <b>Dietary habits at completion</b>                                  |     |           |          |           |      |            |       |
| <b>While in peru did you eat raw fruits or vegetables</b>            | 159 |           |          |           | 0.69 | 0.36, 1.34 | 0.257 |

|                                                                    |     |           |          |          |      |            |       |
|--------------------------------------------------------------------|-----|-----------|----------|----------|------|------------|-------|
| <i>Rarely or Never</i>                                             |     | 128 (81%) | 34 (74%) | 94 (83%) |      |            |       |
| <i>Sometimes</i>                                                   |     | 25 (16%)  | 10 (22%) | 15 (13%) |      |            |       |
| <i>Almost Always or Always</i>                                     |     | 6 (3.8%)  | 2 (4.3%) | 4 (3.5%) |      |            |       |
| <b>While in peru did you drink local water</b>                     | 125 |           |          |          | 0.63 | 0.28, 1.44 | 0.256 |
| <i>Rarely or Never</i>                                             |     | 112 (90%) | 32 (86%) | 80 (91%) |      |            |       |
| <i>Sometimes</i>                                                   |     | 8 (6.4%)  | 2 (5.4%) | 6 (6.8%) |      |            |       |
| <i>Almost Always or Always</i>                                     |     | 5 (4.0%)  | 3 (8.1%) | 2 (2.3%) |      |            |       |
| <i>Missing</i>                                                     |     | 34        | 9        | 25       |      |            |       |
| <b>While in peru did you drink unbottled beverages or with ice</b> | 126 |           |          |          | 1.11 | 0.61, 2.11 | 0.734 |
| <i>Rarely or Never</i>                                             |     | 70 (56%)  | 20 (54%) | 50 (56%) |      |            |       |
| <i>Sometimes</i>                                                   |     | 47 (37%)  | 16 (43%) | 31 (35%) |      |            |       |
| <i>Almost Always or Always</i>                                     |     | 9 (7.1%)  | 1 (2.7%) | 8 (9.0%) |      |            |       |
| <i>Missing</i>                                                     |     | 33        | 9        | 24       |      |            |       |
| <b>While in peru did you eat raw undercooked meat</b>              | 121 |           |          |          | 0.88 | 0.29, 2.99 | 0.826 |
| <i>Rarely or Never</i>                                             |     | 105 (87%) | 30 (86%) | 75 (87%) |      |            |       |
| <i>Sometime</i>                                                    |     | 16 (13%)  | 5 (14%)  | 11 (13%) |      |            |       |
| <i>Missing</i>                                                     |     | 38        | 11       | 27       |      |            |       |
| <b>While in peru did you add sauces to food</b>                    | 121 |           |          |          | 0.91 | 0.54, 1.54 | 0.724 |
| <i>Rarely or Never</i>                                             |     | 38 (31%)  | 10 (29%) | 28 (33%) |      |            |       |
| <i>Sometimes</i>                                                   |     | 53 (44%)  | 16 (46%) | 37 (43%) |      |            |       |
| <i>Almost Always or Always</i>                                     |     | 30 (25%)  | 9 (26%)  | 21 (24%) |      |            |       |
| <i>Missing</i>                                                     |     | 38        | 11       | 27       |      |            |       |
| <b>While in peru did you wash hands before eating</b>              | 121 |           |          |          | 0.81 | 0.40, 1.51 | 0.515 |
| <i>Rarely or Never</i>                                             |     | 9 (7.4%)  | 3 (8.6%) | 6 (7.0%) |      |            |       |
| <i>Sometimes</i>                                                   |     | 34 (28%)  | 7 (20%)  | 27 (31%) |      |            |       |
| <i>Almost Always or Always</i>                                     |     | 78 (64%)  | 25 (71%) | 53 (62%) |      |            |       |
| <i>Missing</i>                                                     |     | 38        | 11       | 27       |      |            |       |

Statistics presented: Median (IQR) for 'Age' and 'Total duration in days' ; n (%) for all other categorial variables

p-value = Estimated by univariate logistic regression

q-value = False discovery rate correction for multiple testing

OR = Odds Ratio, CI = Confidence Interval

HT = Healthy Travelers

TD = Travelers Diarrhea

GERD† = Gastroesophageal reflux disease

Pre-existing bowel disease† = 'Diarrhea-predominant IBS', 'Constipation-predominant IBS', 'Functional diarrhea', 'Functional Constipation'

Other countries† = 'Australia', 'Austria', 'Brazil', 'Belgium', 'France', 'Hong Kong', 'Israel', 'Italy', 'Norway', 'Sweden'

Other diseases† = 'Asthma', 'Insomnia', 'Narcolepsy', 'Migranes', 'Hypothyrodism', 'Osteoarthritis'



**Supplementary Table 2: Description of samples and dietary habits during weekly follow-up**

| Characteristic                                    | Total Obs. | Overall (N = 718) | ND (N = 574) | D (N = 144) | OR          | 95% CI     | p-value | q-value          |
|---------------------------------------------------|------------|-------------------|--------------|-------------|-------------|------------|---------|------------------|
| <b>Stool_grade</b>                                | 718        |                   |              |             | <b>21.6</b> | 13.1, 35.4 | <0.001  | <b>&lt;0.001</b> |
| <i>Grade-1</i>                                    |            | 424 (59%)         | 415 (72%)    | 9 (6.2%)    |             |            |         |                  |
| <i>Grade-2</i>                                    |            | 193 (27%)         | 151 (26%)    | 42 (29%)    |             |            |         |                  |
| <i>Grade-3</i>                                    |            | 84 (12%)          | 8 (1.4%)     | 76 (53%)    |             |            |         |                  |
| <i>Grade-4</i>                                    |            | 17 (2.4%)         | 0 (0%)       | 17 (12%)    |             |            |         |                  |
| <b>Antibiotics in last week</b>                   | 85         | 85 (24%)          | 61 (21%)     | 24 (41%)    | <b>2.55</b> | 1.41, 4.61 | 0.002   | <b>0.007</b>     |
| <i>Missing</i>                                    |            | 371               | 286          | 85          |             |            |         |                  |
| <b>Location of majority of meals in past week</b> |            |                   |              |             |             |            |         |                  |
| <b>Street vendors</b>                             | 439        |                   |              |             | 0.44        | 0.19, 1.03 | 0.057   | 0.1              |
| <i>Rarely or Never</i>                            |            | 362 (82%)         | 303 (81%)    | 59 (92%)    |             |            |         |                  |
| <i>Sometimes</i>                                  |            | 70 (16%)          | 66 (18%)     | 4 (6.2%)    |             |            |         |                  |
| <i>Almost Always or Always</i>                    |            | 7 (1.6%)          | 6 (1.6%)     | 1 (1.6%)    |             |            |         |                  |
| <i>Missing</i>                                    |            | 279               | 199          | 80          |             |            |         |                  |
| <b>Self-prepared food</b>                         | 445        |                   |              |             | 0.63        | 0.41, 0.95 | 0.027   | 0.064            |
| <i>Rarely or Never</i>                            |            | 227 (51%)         | 185 (49%)    | 42 (66%)    |             |            |         |                  |
| <i>Sometimes</i>                                  |            | 139 (31%)         | 125 (33%)    | 14 (22%)    |             |            |         |                  |
| <i>Almost Always or Always</i>                    |            | 79 (18%)          | 71 (19%)     | 8 (12%)     |             |            |         |                  |
| <i>Missing</i>                                    |            | 273               | 193          | 80          |             |            |         |                  |
| <b>Local cheap restaurants</b>                    | 448        |                   |              |             | 0.99        | 0.68, 1.45 | 0.978   | 0.978            |
| <i>Rarely or Never</i>                            |            | 115 (26%)         | 99 (26%)     | 16 (25%)    |             |            |         |                  |
| <i>Sometimes</i>                                  |            | 224 (50%)         | 191 (50%)    | 33 (52%)    |             |            |         |                  |
| <i>Almost Always or Always</i>                    |            | 109 (24%)         | 94 (24%)     | 15 (23%)    |             |            |         |                  |
| <i>Missing</i>                                    |            | 270               | 190          | 80          |             |            |         |                  |
| <b>Expensive restaurants</b>                      | 446        |                   |              |             | 1.23        | 0.79, 1.92 | 0.358   | 0.502            |
| <i>Rarely or Never</i>                            |            | 281 (63%)         | 241 (63%)    | 40 (61%)    |             |            |         |                  |
| <i>Sometimes</i>                                  |            | 147 (33%)         | 126 (33%)    | 21 (32%)    |             |            |         |                  |
| <i>Almost Always or Always</i>                    |            | 18 (4.0%)         | 13 (3.4%)    | 5 (7.6%)    |             |            |         |                  |
| <i>Missing</i>                                    |            | 272               | 194          | 78          |             |            |         |                  |
| <b>Amauta kitchen</b>                             | 448        |                   |              |             | 0.91        | 0.68, 1.20 | 0.495   | 0.577            |
| <i>Rarely or Never</i>                            |            | 168 (38%)         | 141 (37%)    | 27 (42%)    |             |            |         |                  |
| <i>Sometimes</i>                                  |            | 51 (11%)          | 45 (12%)     | 6 (9.4%)    |             |            |         |                  |
| <i>Almost Always or Always</i>                    |            | 229 (51%)         | 198 (52%)    | 31 (48%)    |             |            |         |                  |
| <i>Missing</i>                                    |            | 270               | 190          | 80          |             |            |         |                  |

Statistics presented: n (%) for all other categorical variables

ND = Non-diarrhea samples

D = Diarrhea samples

OR = Odds Ratio, CI = Confidence Interval

CI = Confidence interval

p-value = Estimated by univariate logistic regression with 'subject' as random effect

q-value = False discovery rate correction for multiple testing

**Supplementary Table 3: Features with systematic effects on the microbial community using PERMANOVA with repeated measures**

| Category               | Features                                   | Taxonomic Profile using Metaphlan2 |        |        |              | Resistome Profile using ShortBRED |        |        |              |
|------------------------|--------------------------------------------|------------------------------------|--------|--------|--------------|-----------------------------------|--------|--------|--------------|
|                        |                                            | R2                                 | Pr(>F) | R2 (%) | P.adj        | R2                                | Pr(>F) | R2 (%) | P.adj        |
| Demographics           | <b>Duration of stay (Weeks)</b>            | 0.009                              | 0.007  | 0.897  | <b>0.020</b> | 0.011                             | 0.012  | 1.143  | <b>0.035</b> |
| Demographics           | Lodging (in Cusco)                         | 0.009                              | 0.268  | 0.916  | 0.412        | 0.007                             | 0.499  | 0.735  | 0.641        |
| Demographics           | Previous travel                            | 0.004                              | 0.440  | 0.405  | 0.586        | 0.010                             | 0.026  | 0.961  | 0.064        |
| Demographics           | Traveler type                              | 0.006                              | 0.118  | 0.566  | 0.214        | 0.006                             | 0.143  | 0.624  | 0.286        |
| Demographics           | <b>Country of origin</b>                   | 0.039                              | 0.000  | 3.884  | <b>0.001</b> | 0.034                             | 0.000  | 3.408  | <b>0.001</b> |
| Demographics           | Age                                        | 0.009                              | 0.011  | 0.872  | <b>0.028</b> | 0.003                             | 0.648  | 0.292  | 0.720        |
| Demographics           | Sex                                        | 0.007                              | 0.042  | 0.686  | 0.094        | 0.005                             | 0.275  | 0.470  | 0.458        |
| Sample Characteristics | <b>Stool grade</b>                         | 0.016                              | 0.000  | 1.555  | <b>0.001</b> | 0.013                             | 0.001  | 1.299  | <b>0.002</b> |
| Sample Characteristics | <b>Sample type (Non-diarrhea/Diarrhea)</b> | 0.012                              | 0.000  | 1.168  | <b>0.001</b> | 0.009                             | 0.000  | 0.856  | <b>0.001</b> |
| Sample Characteristics | <b>Sample Collection (Weeks)</b>           | 0.005                              | 0.532  | 0.481  | 0.665        | 0.014                             | 0.000  | 1.350  | <b>0.001</b> |
| Sample Characteristics | <b>Pathogen presence</b>                   | 0.004                              | 0.002  | 0.403  | <b>0.007</b> | 0.004                             | 0.049  | 0.374  | 0.108        |
| Vaccines               | Typhoid                                    | 0.003                              | 0.739  | 0.309  | 0.739        | 0.002                             | 0.972  | 0.169  | 0.972        |
| Vaccines               | Cholera                                    | 0.006                              | 0.396  | 0.647  | 0.566        | 0.006                             | 0.497  | 0.570  | 0.641        |
| Vaccines               | Hepatitis A                                | 0.004                              | 0.624  | 0.362  | 0.672        | 0.003                             | 0.572  | 0.339  | 0.673        |
| Disease                | GERD                                       | 0.006                              | 0.096  | 0.592  | 0.193        | 0.004                             | 0.447  | 0.363  | 0.641        |
| Disease                | Dyspepsia                                  | 0.003                              | 0.638  | 0.325  | 0.672        | 0.002                             | 0.824  | 0.222  | 0.868        |
| Disease                | Lactose intolerance                        | 0.005                              | 0.209  | 0.507  | 0.348        | 0.003                             | 0.513  | 0.329  | 0.641        |
| Disease                | Pre-existing bowel disease                 | 0.003                              | 0.628  | 0.331  | 0.672        | 0.005                             | 0.187  | 0.547  | 0.340        |
|                        | <b>Subject</b>                             | 0.517                              | 0.000  | 51.665 | <b>0.001</b> | 0.505                             | 0.000  | 50.476 | <b>0.001</b> |
|                        | <b>Overall</b>                             | 0.536                              | 0.000  | 53.626 | <b>0.001</b> | 0.533                             | 0.000  | 53.288 | <b>0.001</b> |

**Supplementary Table 4a: Change in alpha-diversity over time in HT and TD subjects after adjusting for age, gender and region**

| term                                                      | Richness |           |           |              | Shannon diversity index |           |           |         |
|-----------------------------------------------------------|----------|-----------|-----------|--------------|-------------------------|-----------|-----------|---------|
|                                                           | estimate | std.error | statistic | p.value      | estimate                | std.error | statistic | p.value |
| (Intercept)                                               | 4.009    | 0.058     | 69.021    | 0.000        | 2.732                   | 0.109     | 25.062    | 0.000   |
| Abx_dur_stay[Yes]                                         | -0.040   | 0.033     | -1.214    | 0.225        | -0.023                  | 0.060     | -0.393    | 0.695   |
| Age                                                       | 0.016    | 0.014     | 1.121     | 0.262        | 0.021                   | 0.025     | 0.832     | 0.407   |
| Gender[Male]                                              | 0.005    | 0.027     | 0.197     | 0.844        | 0.007                   | 0.050     | 0.136     | 0.892   |
| Time_in_Peru_days                                         | -0.001   | 0.020     | -0.042    | 0.967        | 0.014                   | 0.047     | 0.289     | 0.773   |
| Region[Europe]                                            | 0.050    | 0.053     | 0.939     | 0.348        | -0.044                  | 0.099     | -0.444    | 0.657   |
| Region[North America]                                     | 0.034    | 0.054     | 0.627     | 0.531        | -0.089                  | 0.099     | -0.901    | 0.369   |
| Sample_type[Diarrhea TD]                                  | -0.047   | 0.042     | -1.117    | 0.264        | -0.118                  | 0.089     | -1.326    | 0.185   |
| <b>Sample_type[Diarrhea TD:Time_in_Peru_days]</b>         | 0.078    | 0.038     | 2.074     | <b>0.038</b> | 0.138                   | 0.090     | 1.544     | 0.123   |
| <b>Sample_type[Non-diarrhea PostTD]</b>                   | -0.128   | 0.046     | -2.801    | <b>0.005</b> | -0.142                  | 0.097     | -1.474    | 0.141   |
| <b>Sample_type[Non-diarrhea PostTD:Time_in_Peru_days]</b> | 0.083    | 0.033     | 2.523     | <b>0.012</b> | 0.088                   | 0.077     | 1.142     | 0.254   |
| Sample_type[Non-diarrhea PreTD]                           | 0.004    | 0.038     | 0.112     | 0.911        | -0.060                  | 0.079     | -0.757    | 0.450   |
| Sample_type[Non-diarrhea PreTD:Time_in_Peru_days]         | 0.014    | 0.034     | 0.399     | 0.690        | 0.020                   | 0.080     | 0.255     | 0.799   |

formula = Response [Richness|Shannon] ~ Sample\_type \* Length\_of\_stay\_in\_days + Age + Gender + Region + Abx\_dur\_stay + (1 | Subject\_id)  
 Linear mixed effect mode (LMM) was used to fit **Shannon index** using `lmer` function of lmerTest package in R.  
 Generalized linear mixed model (GLMM) was used to fit **Richness** using glmer (family = poisson) function of lme4 package in R

**Supplementary Table 4b: Alpha-diversity comparison of diarrhea samples with matched non-diarrhea samples (Pre TD and Post TD)**

| term                                            | Richness |           |           |              | Shannon diversity index |           |           |              |
|-------------------------------------------------|----------|-----------|-----------|--------------|-------------------------|-----------|-----------|--------------|
|                                                 | estimate | std.error | statistic | adj.p.value  | estimate                | std.error | statistic | adj.p.value  |
| <b>Non-diarrhea PostTD - Diarrhea TD</b>        | -0.146   | 0.026     | -5.552    | <b>0.000</b> | -0.205                  | 0.081     | -2.531    | <b>0.038</b> |
| <b>Non-diarrhea PostTD - Non-diarrhea PreTD</b> | -0.156   | 0.032     | -4.820    | <b>0.000</b> | -0.195                  | 0.095     | -2.048    | 0.064        |
| <b>Non-diarrhea PreTD - Diarrhea TD</b>         | 0.010    | 0.026     | 0.373     | 0.709        | -0.011                  | 0.085     | -0.123    | 0.902        |

formula = Response [Richness|Shannon] ~ Sample\_type + Age + Gender + Region + Abx\_dur\_stay + Length\_of\_stay\_in\_days + (1 | Subject\_id)  
 Results are averaged over the levels of: Sex, Region, Abx\_dur\_stay  
 P value adjustment: **FDR** method for 3 tests

**Supplementary Table 5a: Features associated with intra-subject microbial stability over time**

| term                     | 1 - Bray-curtis index |           |           |              | 1 - Jaccard index |           |           |              |
|--------------------------|-----------------------|-----------|-----------|--------------|-------------------|-----------|-----------|--------------|
|                          | estimate              | std.error | statistic | p.value      | estimate          | std.error | statistic | p.value      |
| (Intercept)              | 0.399                 | 0.087     | 4.595     | 0.000        | 0.301             | 0.092     | 3.292     | 0.002        |
| Abx_dur_stay[Yes]        | 0.032                 | 0.029     | 1.124     | 0.267        | 0.030             | 0.030     | 0.991     | 0.327        |
| Age                      | 0.000                 | 0.011     | 0.030     | 0.976        | 0.002             | 0.012     | 0.179     | 0.859        |
| <b>Baseline_Shannon</b>  | 0.359                 | 0.064     | 5.647     | <b>0.000</b> | 0.333             | 0.067     | 4.952     | <b>0.000</b> |
| Sex[Male]                | 0.019                 | 0.025     | 0.761     | 0.450        | 0.013             | 0.026     | 0.498     | 0.620        |
| Time_in_Peru_days        | -0.014                | 0.019     | -0.742    | 0.459        | -0.017            | 0.020     | -0.883    | 0.378        |
| Region[Europe]           | -0.047                | 0.060     | -0.798    | 0.427        | -0.069            | 0.063     | -1.102    | 0.274        |
| Region[North America]    | -0.039                | 0.059     | -0.659    | 0.511        | -0.060            | 0.062     | -0.973    | 0.333        |
| <b>Traveler_type[TD]</b> | -0.083                | 0.023     | -3.581    | <b>0.001</b> | -0.086            | 0.024     | -3.514    | <b>0.001</b> |

formula = Response [Bray-Curtis|Jaccard] ~ Traveler\_type + Time\_in\_Peru\_days + Baseline\_Shannon + Age + Sex + Region + Abx\_dur\_stay + (1 | Subject\_id)

Linear mixed effect mode (LMM) was used to fit Bray-Curtis and Jaccard index using `lmer` function of lmerTest package in R.

**Supplementary Table 5b: Features associated with taxonomic divergence (comparing beta-diversity of each traveler's samples to first week baseline sample)**

| term                    | 1 - Bray-curtis index |           |           |              | 1 - Jaccard index |           |           |              |
|-------------------------|-----------------------|-----------|-----------|--------------|-------------------|-----------|-----------|--------------|
|                         | estimate              | std.error | statistic | p.value      | estimate          | std.error | statistic | p.value      |
| (Intercept)             | 0.348                 | 0.125     | 2.777     | 0.008        | 0.272             | 0.124     | 2.188     | 0.034        |
| Abx_dur_stay[Yes]       | 0.017                 | 0.040     | 0.428     | 0.671        | 0.011             | 0.040     | 0.286     | 0.776        |
| Age                     | 0.009                 | 0.016     | 0.526     | 0.602        | 0.011             | 0.016     | 0.679     | 0.501        |
| <b>Baseline_Shannon</b> | 0.454                 | 0.107     | 4.221     | <b>0.000</b> | 0.392             | 0.107     | 3.672     | <b>0.001</b> |
| Sex[Male]               | 0.002                 | 0.034     | 0.057     | 0.955        | 0.002             | 0.034     | 0.056     | 0.956        |
| <b>Region[Europe]</b>   | -0.143                | 0.074     | -1.944    | 0.058        | -0.158            | 0.073     | -2.161    | <b>0.036</b> |
| Region[North America]   | -0.124                | 0.071     | -1.745    | 0.088        | -0.137            | 0.070     | -1.942    | 0.058        |
| <b>Time_diff_days</b>   | -0.076                | 0.016     | -4.895    | <b>0.000</b> | -0.079            | 0.015     | -5.099    | <b>0.000</b> |
| Traveler_type[TD]       | -0.021                | 0.034     | -0.621    | 0.538        | -0.024            | 0.034     | -0.713    | 0.480        |

formula = Response [Bray-Curtis|Jaccard] ~ Traveler\_type + Time\_diff\_days + Baseline\_Shannon + Age + Sex + Region + Abx\_dur\_stay + (1 | Subject\_id)

Linear mixed effect mode (LMM) was used to fit Bray-Curtis and Jaccard index using `lmer` function of lmerTest package in R.

**Supplementary Table 6: Summary of microbiome shift events**

| Traveler type | Sample type | Microbiome shifts |          |          |
|---------------|-------------|-------------------|----------|----------|
|               |             | Total Possible    | Observed | Rate (%) |
| HT            | A-A         | 128               | 28       | 21.90%   |
| TD            | A-A         | 147               | 37       | 25.20%   |
| TD            | A-D         | 120               | 68       | 56.70%   |
| TD            | D-D         | 13                | 8        | 61.50%   |

**Supplementary Table 7: Summary of the differential network analysis.**

| <b>S_ID</b>                                 | <b>n (cntrl)</b> | <b>n (diar)</b> | <b>core (diar)</b> | <b>Union</b> | <b>Intersect</b> | <b>Exclusive</b> | <b>Jaccard -score</b> | <b>NESH - score</b> | <b>DelBet</b> | <b>COM</b> |
|---------------------------------------------|------------------|-----------------|--------------------|--------------|------------------|------------------|-----------------------|---------------------|---------------|------------|
| <i>Ruminococcus_torques</i>                 | 1                | 6               | 3                  | 6            | 1                | 5                | 0.167                 | 2.381               | 0.542         | 1          |
| <i>Eubacterium_rectale</i>                  | 3                | 5               | 3                  | 8            | 0                | 5                | 0                     | 2.339               | 0.125         | 3          |
| <i>Bacteroides_uniformis</i>                | 2                | 6               | 2                  | 7            | 1                | 5                | 0.143                 | 2.286               | 0.331         | 4          |
| <i>Methanobrevibacter_smithii</i>           | 1                | 2               | 1                  | 3            | 0                | 2                | 0                     | 1.952               | 0.206         | 1          |
| <i>Roseburia_inulinivorans</i>              | 1                | 2               | 2                  | 3            | 0                | 2                | 0                     | 1.952               | 0.125         | 1          |
| <i>Coprococcus_comes</i>                    | 3                | 3               | 3                  | 6            | 0                | 3                | 0                     | 1.929               | -0.055        | 2          |
| <i>Bifidobacterium_longum</i>               | 4                | 6               | 3                  | 8            | 2                | 4                | 0.25                  | 1.821               | 0.751         | 1          |
| <i>Bifidobacterium_adolescentis</i>         | 3                | 4               | 2                  | 6            | 1                | 3                | 0.167                 | 1.762               | 0.553         | 1          |
| <i>Bifidobacterium_pseudocatenulatum</i>    | 1                | 1               | 1                  | 2            | 0                | 1                | 0                     | 1.643               | 0             | 1          |
| <i>Clostridium_bartlettii</i>               | 1                | 1               | 1                  | 2            | 0                | 1                | 0                     | 1.643               | 0             | 1          |
| <i>Bacteroides_caccae</i>                   | 1                | 3               | 2                  | 3            | 1                | 2                | 0.333                 | 1.619               | 0.227         | 4          |
| <i>Subdoligranulum_unclassified</i>         | 3                | 3               | 2                  | 5            | 1                | 2                | 0.2                   | 1.486               | -0.013        | 5          |
| <i>Ruminococcus_bromii</i>                  | 2                | 1               | 1                  | 3            | 0                | 1                | 0                     | 1.476               | -0.34         | 1          |
| <i>Ruminococcus_lactaris</i>                | 2                | 1               | 1                  | 3            | 0                | 1                | 0                     | 1.476               | 0             | 3          |
| <i>Collinsella_aerofaciens</i>              | 4                | 6               | 3                  | 7            | 3                | 3                | 0.429                 | 1.429               | 0.686         | 2          |
| <i>Dorea_formicigenerans</i>                | 5                | 6               | 3                  | 8            | 3                | 3                | 0.375                 | 1.429               | 0.414         | 3          |
| <i>Faecalibacterium_prausnitzii</i>         | 7                | 3               | 2                  | 9            | 1                | 2                | 0.111                 | 1.397               | -0.866        | 5          |
| <i>Eubacterium_ramulus</i>                  | 3                | 1               | 1                  | 4            | 0                | 1                | 0                     | 1.393               | -0.129        | 3          |
| <i>Alistipes_putredinis</i>                 | 1                | 2               | 2                  | 2            | 1                | 1                | 0.5                   | 1.143               | 0             | 4          |
| <i>Bacteroides_dorei</i>                    | 3                | 2               | 2                  | 4            | 1                | 1                | 0.25                  | 1.143               | -0.107        | 2          |
| <i>Escherichia_coli</i>                     | 1                | 2               | 2                  | 2            | 1                | 1                | 0.5                   | 1.143               | 0.023         | 2          |
| <i>Escherichia_unclassified</i>             | 1                | 2               | 2                  | 2            | 1                | 1                | 0.5                   | 1.143               | 0.134         | 2          |
| <i>Dorea_longicatena</i>                    | 6                | 7               | 3                  | 8            | 5                | 2                | 0.625                 | 0.911               | 0.264         | 3          |
| <i>Eubacterium_hallii</i>                   | 6                | 4               | 3                  | 7            | 3                | 1                | 0.429                 | 0.857               | -0.461        | 3          |
| <i>Ruminococcus_sp_5_1_39BFAA</i>           | 5                | 5               | 3                  | 6            | 4                | 1                | 0.667                 | 0.643               | 0.093         | 3          |
| <i>Ruminococcus_gnavus</i>                  | 5                | 2               | 2                  | 5            | 2                | 0                | 0.4                   | 0.6                 | -1            | 5          |
| <i>Bacteroides_vulgatus</i>                 | 5                | 3               | 2                  | 5            | 3                | 0                | 0.6                   | 0.4                 | -0.377        | 4          |
| <i>Lachnospiraceae_bacterium_1_1_57_FAA</i> | 1                | 1               | 1                  | 1            | 1                | 0                | 1                     | 0                   | 0             | 1          |
| <i>Ruminococcus_obeum</i>                   | 4                | 4               | 3                  | 4            | 4                | 0                | 1                     | 0                   | 0.028         | 3          |
| <i>Streptococcus_parasanguinis</i>          | 1                | 1               | 1                  | 1            | 1                | 0                | 1                     | 0                   | 0             | 6          |
| <i>Streptococcus_salivarius</i>             | 1                | 1               | 1                  | 1            | 1                | 0                | 1                     | 0                   | 0             | 6          |

n(control/case) refers to degree of the node in control/case, Exclusive refers to exclusive in 'case', DelBet refers to the delta betweenness score from control to case and COM refers to the community affiliation of the node in 'case'.

**Supplementary Table 8: Functionally validated antibiotic resistance gene sequences from previously published cohort that were used to build ShortBRED markers**

| Num          | Study_Title                                                                                                                                     | Pubmed ID            | # of Library | # of Abx  | # of Slxns  | Uniq_AR_ProteinSeqs |
|--------------|-------------------------------------------------------------------------------------------------------------------------------------------------|----------------------|--------------|-----------|-------------|---------------------|
| 1            | The shared antibiotic resistome of soil bacteria and human pathogens                                                                            | 22936781             | 1            | 16        | 16          | 54                  |
| 2            | Pediatric fecal microbiota harbor diverse and novel antibiotic resistance genes                                                                 | 24236055             | 22           | 13        | 169         | 2536                |
| 3            | Bacterial phylogeny structures soil resistomes across habitats                                                                                  | 24847883             | 18           | 15        | 219         | 2527                |
| 4            | Gut resistome development in healthy twin pairs in the first year of life                                                                       | 26113976             | 26           | 16        | 195         | 1383                |
| 5            | The microbiome of uncontacted Amerindians                                                                                                       | 26229982             | 16           | 10        | 52          | 106                 |
| 6            | Developmental dynamics of the preterm infant gut microbiota and antibiotic resistome                                                            | 27572443             | 21           | 11        | 182         | 1129                |
| 7            | Interconnected microbiomes and resistomes in low-income human habitats                                                                          | 27172044             | 79           | 16        | 546         | 1915                |
| 8            | Characterization of Wild and Captive Baboon Gut Microbiota and Their Antibiotic Resistomes                                                      | 29963641             | 8            | 9         | 43          | 382                 |
| 9            | Persistent metagenomic signatures of early-life hospitalization and antibiotic treatment in the infant gut microbiota and resistome             | 31501537             | 22           | 15        | 262         | 1404                |
| 10           | <b>Impact of international travel and diarrhea on gut microbiome and resistome dynamics</b>                                                     | <b>Current study</b> | 21           | 17        | 388         | 2065                |
| 11           | Manure Microbial Communities and Resistance Profiles Reconfigure after Transition to Manure Pits and Differ from Those in Fertilized Field Soil | 33975936             | 9            | 17        | 153         | 2235                |
| 12           | Destination shapes antibiotic resistance gene acquisitions, abundance increases, and diversity changes in Dutch travelers                       | 34092249             | 21           | 15        | 234         | 1443                |
| 13           | The microbiome and resistome of chimpanzees, gorillas, and humans across host lifestyle and geography                                           | 32203121             | 17           | 14        | 142         | 323                 |
| <b>TOTAL</b> |                                                                                                                                                 |                      | <b>281</b>   | <b>14</b> | <b>2367</b> | <b>17502</b>        |

**Supplementary Table 9a: Change in alpha-diversity and cumulative abundance of ARGs over time**

| term                                               | Richness |           |           |              | Shannon diversity index |           |           |              | Cumulative abundance log10(RPKM) |           |           |         |
|----------------------------------------------------|----------|-----------|-----------|--------------|-------------------------|-----------|-----------|--------------|----------------------------------|-----------|-----------|---------|
|                                                    | estimate | std.error | statistic | p.value      | estimate                | std.error | statistic | p.value      | estimate                         | std.error | statistic | p.value |
| (Intercept)                                        | 3.742    | 0.088     | 42.462    | 0.000        | 2.999                   | 0.116     | 25.881    | 0.000        | 3.025                            | 0.087     | 34.575    | 0.000   |
| Abx_dur_stay[Yes]                                  | -0.091   | 0.051     | -1.790    | 0.073        | -0.023                  | 0.061     | -0.371    | 0.711        | -0.041                           | 0.050     | -0.810    | 0.420   |
| Age                                                | 0.038    | 0.021     | 1.761     | 0.078        | 0.059                   | 0.026     | 2.265     | <b>0.025</b> | 0.017                            | 0.021     | 0.780     | 0.437   |
| Sex[Male]                                          | -0.025   | 0.043     | -0.597    | 0.550        | -0.079                  | 0.051     | -1.527    | 0.129        | 0.004                            | 0.042     | 0.088     | 0.930   |
| Time_in_Peru_days                                  | 0.034    | 0.023     | 1.459     | 0.145        | 0.015                   | 0.055     | 0.280     | 0.780        | 0.023                            | 0.028     | 0.843     | 0.399   |
| Region[Europe]                                     | 0.064    | 0.081     | 0.788     | 0.431        | -0.119                  | 0.104     | -1.144    | 0.254        | 0.086                            | 0.080     | 1.071     | 0.286   |
| Region[North America]                              | 0.088    | 0.082     | 1.068     | 0.286        | -0.064                  | 0.105     | -0.611    | 0.542        | 0.090                            | 0.081     | 1.113     | 0.268   |
| Sample_type[Diarrhea TD]                           | 0.009    | 0.058     | 0.162     | 0.871        | -0.014                  | 0.100     | -0.136    | 0.892        | 0.105                            | 0.062     | 1.696     | 0.091   |
| <b>Sample_type[Diarrhea TD]:Time_in_Peru_days</b>  | 0.110    | 0.043     | 2.581     | <b>0.010</b> | 0.113                   | 0.106     | 1.073     | 0.284        | 0.040                            | 0.053     | 0.757     | 0.450   |
| Sample_type[Non-diarrhea PostTD]                   | -0.063   | 0.062     | -1.013    | 0.311        | -0.159                  | 0.109     | -1.456    | 0.146        | 0.102                            | 0.066     | 1.537     | 0.125   |
| Sample_type[Non-diarrhea PostTD:Time_in_Peru_days] | 0.007    | 0.038     | 0.190     | 0.849        | 0.030                   | 0.090     | 0.336     | 0.737        | -0.017                           | 0.045     | -0.378    | 0.706   |
| Sample_type[Non-diarrhea PreTD]                    | -0.016   | 0.054     | -0.297    | 0.766        | -0.081                  | 0.088     | -0.923    | 0.357        | 0.056                            | 0.057     | 0.986     | 0.325   |
| Sample_type[Non-diarrhea PreTD:Time_in_Peru_days]  | -0.073   | 0.040     | -1.822    | 0.068        | -0.043                  | 0.094     | -0.456    | 0.649        | -0.058                           | 0.047     | -1.220    | 0.223   |

formula = Response [Richness|Shannon | log10(RPKM)] ~ Sample\_type \* Length\_of\_stay\_in\_days + Age + Sex + Region + Abx\_dur\_stay + (1 | Subject\_id)

Linear mixed effect mode (LMM) was used to fit **Shannon index and RPKM** using `lmer` function of lmerTest package in R.  
Generalized linear mixed model (GLMM) was used to fit **Richness** using glmer (family = poisson) function of lme4 package in R

**Supplementary Table 9b: Prior week antibiotics use significantly associated with increased richness and abundance of ARGs**

| term                                 | Richness |           |           |              | Shannon diversity index |           |           |         | Cumulative abundance log10(RPKM) |           |           |              |
|--------------------------------------|----------|-----------|-----------|--------------|-------------------------|-----------|-----------|---------|----------------------------------|-----------|-----------|--------------|
|                                      | estimate | std.error | statistic | p.value      | estimate                | std.error | statistic | p.value | estimate                         | std.error | statistic | p.value      |
| (Intercept)                          | 3.589    | 0.109     | 33.050    | 0.000        | 2.891                   | 0.137     | 21.033    | 0.000   | 3.037                            | 0.095     | 31.969    | 0.000        |
| Age                                  | -0.002   | 0.028     | -0.056    | 0.955        | 0.027                   | 0.031     | 0.855     | 0.396   | 0.000                            | 0.024     | -0.010    | 0.992        |
| <b>Antibiotics_in_last_week[Yes]</b> | 0.140    | 0.028     | 5.004     | <b>0.000</b> | 0.047                   | 0.067     | 0.706     | 0.481   | 0.101                            | 0.034     | 2.993     | <b>0.003</b> |
| SexMale                              | -0.031   | 0.060     | -0.517    | 0.605        | -0.110                  | 0.070     | -1.560    | 0.122   | 0.020                            | 0.052     | 0.390     | 0.697        |
| RegionEurope                         | 0.187    | 0.109     | 1.722     | 0.085        | -0.011                  | 0.137     | -0.077    | 0.938   | 0.109                            | 0.095     | 1.151     | 0.252        |
| RegionNorth America                  | 0.209    | 0.110     | 1.898     | 0.058        | 0.025                   | 0.138     | 0.181     | 0.857   | 0.102                            | 0.096     | 1.061     | 0.291        |

formula = Response [Richness|Shannon | log10(RPKM)] ~ Antibiotics\_in\_last\_week + Age + Sex + Region + (1 | Subject\_id)

Linear mixed model fit by REML. t-tests use Satterthwaite's method [lmerModLmerTest]

Linear mixed effect mode (LMM) was used to fit **Shannon index and RPKM** using `lmer` function of lmerTest package in R.  
Generalized linear mixed model (GLMM) was used to fit **Richness** using glmer (family = poisson) function of lme4 package in R

**Supplementary Table 9c: Increase in alpha-diversity and cumulative abundance of antibiotic resistance genes during diarrheal event**

| term                                            | Richness |            |           |              | Shannon diversity index |            |           |              | Cumulative abundance log10(RPKM) |            |           |              |
|-------------------------------------------------|----------|------------|-----------|--------------|-------------------------|------------|-----------|--------------|----------------------------------|------------|-----------|--------------|
|                                                 | estimate | std. error | statistic | adj. p.value | estimate                | std. error | statistic | adj. p.value | estimate                         | std. error | statistic | adj. p.value |
| <b>Diarrhea TD - Non-diarrhea PreTD</b>         | 0.221    | 0.031      | 7.177     | <b>0.000</b> | 0.269                   | 0.094      | 2.879     | <b>0.014</b> | 0.143                            | 0.044      | 3.227     | <b>0.005</b> |
| <b>Non-diarrhea PostTD - Non-diarrhea PreTD</b> | 0.041    | 0.039      | 1.034     | 0.301        | 0.038                   | 0.103      | 0.369     | 0.712        | 0.127                            | 0.053      | 2.403     | <b>0.026</b> |
| <b>Non-diarrhea PostTD - Diarrhea TD</b>        | -0.180   | 0.029      | -6.150    | <b>0.000</b> | -0.231                  | 0.089      | -2.598    | <b>0.016</b> | -0.015                           | 0.042      | -0.364    | 0.716        |

formula = Response [Richness|Shannon | log10(RPKM)] ~ Sample\_type + Age + Sex+ Region + Abx\_dur\_stay + Length\_of\_stay\_in\_days + (1 | Subject\_id)

Results are averaged over the levels of: Sex, Region, Abx\_dur\_stay

P value adjustment: **FDR** method for 3 tests



**Supplementary Table 10a: Intra-subject resistome stability over time**

| term                     | 1 - Bray-curtis index |           |           |              | 1 - Jaccard index |           |           |              |
|--------------------------|-----------------------|-----------|-----------|--------------|-------------------|-----------|-----------|--------------|
|                          | estimate              | std.error | statistic | p.value      | estimate          | std.error | statistic | p.value      |
| (Intercept)              | 0.617                 | 0.105     | 5.852     | 0.000        | 0.480             | 0.101     | 4.756     | 0.000        |
| Abx_dur_stay[Yes]        | 0.049                 | 0.033     | 1.475     | 0.145        | 0.043             | 0.032     | 1.374     | 0.174        |
| Age                      | 0.014                 | 0.012     | 1.105     | 0.273        | 0.014             | 0.012     | 1.197     | 0.235        |
| Baseline_Shannon         | 0.080                 | 0.082     | 0.970     | 0.335        | 0.058             | 0.078     | 0.743     | 0.460        |
| Sex[Male]                | -0.014                | 0.027     | -0.519    | 0.606        | -0.016            | 0.026     | -0.611    | 0.543        |
| <b>Time_in_Peru_days</b> | 0.028                 | 0.015     | 1.834     | 0.068        | 0.030             | 0.015     | 2.027     | <b>0.044</b> |
| Region[Europe]           | -0.095                | 0.065     | -1.462    | 0.147        | -0.099            | 0.062     | -1.591    | 0.115        |
| Region[North America]    | -0.108                | 0.064     | -1.702    | 0.092        | -0.109            | 0.061     | -1.788    | 0.077        |
| <b>Traveler_type[TD]</b> | -0.052                | 0.026     | -2.049    | <b>0.044</b> | -0.051            | 0.024     | -2.064    | <b>0.043</b> |

formula = [Bray-curtis | Jaccard] ~ Traveler\_type + Length\_of\_stay\_in\_days + Baseline\_Shannon + Age + Sex + Region + Abx\_dur\_stay + (1 | Subject\_id)  
 Linear mixed model fit by REML. t-tests use Satterthwaite's method ['lmerModLmerTest']

**Supplementary Table 10b: Comparing beta-diversity of each traveler's samples to first week baseline sample**

| term                  | 1 - Bray-curtis index |           |           |              | 1 - Jaccard index |           |           |              |
|-----------------------|-----------------------|-----------|-----------|--------------|-------------------|-----------|-----------|--------------|
|                       | estimate              | std.error | statistic | p.value      | estimate          | std.error | statistic | p.value      |
| (Intercept)           | 0.703                 | 0.103     | 6.831     | 0.000        | 0.561             | 0.095     | 5.932     | 0.000        |
| Abx_dur_stay[Yes]     | 0.010                 | 0.035     | 0.296     | 0.769        | 0.008             | 0.032     | 0.236     | 0.815        |
| Age                   | 0.022                 | 0.014     | 1.578     | 0.122        | 0.024             | 0.013     | 1.836     | 0.073        |
| Baseline_Shannon      | 0.009                 | 0.085     | 0.110     | 0.913        | -0.003            | 0.078     | -0.033    | 0.974        |
| Sex[Male]             | 0.023                 | 0.030     | 0.766     | 0.448        | 0.019             | 0.027     | 0.676     | 0.502        |
| Region[Europe]        | -0.107                | 0.064     | -1.672    | 0.100        | -0.118            | 0.059     | -2.006    | <b>0.050</b> |
| Region[North America] | -0.120                | 0.062     | -1.950    | 0.056        | -0.127            | 0.057     | -2.242    | <b>0.029</b> |
| <b>Time_diff_days</b> | -0.036                | 0.014     | -2.593    | <b>0.010</b> | -0.037            | 0.013     | -2.837    | <b>0.005</b> |
| Traveler_type[TD]     | -0.037                | 0.030     | -1.241    | 0.221        | -0.033            | 0.027     | -1.195    | 0.238        |

formula = [Bray-curtis | Jaccard] ~ Traveler\_type + Time\_diff\_days + Baseline\_Shannon + Age + Sex + Region + Abx\_dur\_stay + (1 | Subject\_id)  
 Linear mixed model fit by REML. t-tests use Satterthwaite's method ['lmerModLmerTest']

**Supplementary Table 11: Description of enteric pathogens detected using multiplex PCR**

| Characteristic                                                                        | Overall<br>N = 718 | Non-diarrhea<br>N = 574 | Diarrhea<br>N = 144 | OR   | 95% CI     | p-<br>value      | q-<br>valu<br>e |
|---------------------------------------------------------------------------------------|--------------------|-------------------------|---------------------|------|------------|------------------|-----------------|
| <b>Diarrheagenic <i>E.coli</i> (DEC)</b>                                              |                    |                         |                     |      |            |                  |                 |
| <i>EAEC</i>                                                                           | 47 (6.9%)          | 40 (7.4%)               | 7 (5.2%)            | 0.69 | 0.30, 1.57 | 0.372            | 0.496           |
| <i>EPEC</i>                                                                           | 48 (7.1%)          | 38 (7.0%)               | 10 (7.4%)           | 1.06 | 0.51, 2.19 | 0.872            | 0.872           |
| <i>ETEC</i>                                                                           | 39 (5.8%)          | 22 (4.1%)               | 17 (13%)            | 3.42 | 1.70, 6.88 | <b>&lt;0.001</b> | <b>0.002</b>    |
| <i>DAEC</i>                                                                           | 33 (4.9%)          | 26 (4.8%)               | 7 (5.2%)            | 1.09 | 0.46, 2.56 | 0.851            | 0.872           |
| <i>STEC</i>                                                                           | 18 (2.7%)          | 12 (2.2%)               | 6 (4.4%)            | 2.05 | 0.76, 5.58 | 0.158            | 0.237           |
| <i>EIEC</i>                                                                           | 4 (0.6%)           | 3 (0.6%)                | 1 (0.7%)            | 1.34 | 0.14, 13.0 | 0.8              | 0.872           |
| <b>Other bacterial pathogens</b>                                                      |                    |                         |                     |      |            |                  |                 |
| <i>Campylobacter</i>                                                                  | 18 (2.6%)          | 7 (1.3%)                | 11 (7.7%)           | 6.57 | 2.50, 17.3 | <b>&lt;0.001</b> | <b>0.002</b>    |
| <i>Shigella</i>                                                                       | 3 (0.4%)           | 1 (0.2%)                | 2 (1.4%)            | 7.91 | 0.71, 87.9 | 0.092            | 0.158           |
| <b>Viral pathogens</b>                                                                |                    |                         |                     |      |            |                  |                 |
| <i>Norovirus</i>                                                                      | 29 (4.2%)          | 18 (3.2%)               | 11 (7.7%)           | 2.51 | 1.16, 5.43 | <b>0.02</b>      | <b>0.04</b>     |
| <b>Infection type</b>                                                                 |                    |                         |                     |      |            |                  |                 |
| No pathogen detected                                                                  | 479 (69%)          | 399 (72%)               | 80 (56%)            | 0.5  | 0.34, 0.74 | <b>&lt;0.001</b> | <b>0.002</b>    |
| Mixed pathogens detected                                                              | 20 (2.8%)          | 11 (1.9%)               | 9 (6.2%)            | 3.41 | 1.39, 8.40 | <b>0.008</b>     | <b>0.018</b>    |
| Any pathogen detected                                                                 | 217 (31%)          | 155 (28%)               | 62 (44%)            | 2    | 1.35, 2.96 | <b>&lt;0.001</b> | <b>0.002</b>    |
| Statistics presented: n (%) for all other categorical variables                       |                    |                         |                     |      |            |                  |                 |
| p-value = Estimated by univariate logistic regression with 'subject' as random effect |                    |                         |                     |      |            |                  |                 |
| q-value = False discovery rate correction for multiple testing                        |                    |                         |                     |      |            |                  |                 |
| OR = Odds Ratio, CI = Confidence Interval                                             |                    |                         |                     |      |            |                  |                 |

**Supplementary Table 12: AST profile of DEC isolates**

| Abx_class                         | Abx_name                              | Abx_code | Diarrheagenic E.coli strains |              |             |            |
|-----------------------------------|---------------------------------------|----------|------------------------------|--------------|-------------|------------|
|                                   |                                       |          | Resistant                    | Intermediate | Susceptible | Missing    |
| <i>Aminoglycoside</i>             | <i>Amikacin</i>                       | AMK      | 0 (0%)                       | 0 (0%)       | 169 (100%)  | 0 (0%)     |
| <i>Beta_lactam</i>                | <i>Ceftazidime</i>                    | CAZ      | 0 (0%)                       | 0 (0%)       | 150 (88.8%) | 19 (11.2%) |
| <i>Beta_lactam</i>                | <i>Cefotaxime - Clavulanate</i>       | CTX_CLA  | 0 (0%)                       | 2 (1.2%)     | 148 (87.6%) | 19 (11.2%) |
| <i>Beta_lactam</i>                | <i>Imipenem</i>                       | IPM      | 0 (0%)                       | 0 (0%)       | 169 (100%)  | 0 (0%)     |
| <i>Nitrofurans</i>                | <i>Nitrofurantoin</i>                 | NIT      | 0 (0%)                       | 0 (0%)       | 150 (88.8%) | 19 (11.2%) |
| <i>Aminoglycoside</i>             | <i>Gentamycin</i>                     | GEN      | 6 (3.6%)                     | 0 (0%)       | 163 (96.4%) | 0 (0%)     |
| <i>Amphenicol</i>                 | <i>Chloramphenical</i>                | CHL      | 20 (11.8%)                   | 1 (0.6%)     | 147 (87%)   | 1 (0.6%)   |
| <i>Beta_lactam</i>                | <i>Ticarcillin - Clavulanic Acid</i>  | TIM      | 64 (37.9%)                   | 8 (4.7%)     | 78 (46.2%)  | 19 (11.2%) |
| <i>Beta_lactam</i>                | <i>Amoxicillin - Clavulanate</i>      | AMX_CLA  | 30 (17.8%)                   | 39 (23.1%)   | 99 (58.6%)  | 1 (0.6%)   |
| <i>Beta_lactam</i>                | <i>Cefalotin</i>                      | CEF      | 26 (15.4%)                   | 55 (32.5%)   | 88 (52.1%)  | 0 (0%)     |
| <i>Beta_lactam</i>                | <i>Ceftriaxone</i>                    | CRO      | 3 (1.8%)                     | 2 (1.2%)     | 164 (97%)   | 0 (0%)     |
| <i>Beta_lactam</i>                | <i>Cefepime</i>                       | FEP      | 1 (0.6%)                     | 1 (0.6%)     | 167 (98.8%) | 0 (0%)     |
| <i>Macrolide</i>                  | <i>Azithromycin</i>                   | AZM      | 40 (23.7%)                   | 33 (19.5%)   | 95 (56.2%)  | 1 (0.6%)   |
| <i>Quinolone</i>                  | <i>Nalidixic Acid</i>                 | NAL      | 49 (29%)                     | 14 (8.3%)    | 104 (61.5%) | 2 (1.2%)   |
| <i>Quinolone</i>                  | <i>Ciprofloxacin</i>                  | CIP      | 13 (7.7%)                    | 18 (10.7%)   | 138 (81.7%) | 0 (0%)     |
| <i>Beta_lactam</i>                | <i>Ampicillin</i>                     | AMP      | 111 (65.7%)                  | 9 (5.3%)     | 48 (28.4%)  | 1 (0.6%)   |
| <i>Beta_lactam</i>                | <i>Ticarcillin</i>                    | TIC      | 103 (60.9%)                  | 2 (1.2%)     | 59 (34.9%)  | 5 (3%)     |
| <i>Folate_synthesis_inhibitor</i> | <i>Trimethoprim-sulphamethoxazole</i> | SXT      | 90 (53.3%)                   | 2 (1.2%)     | 56 (33.1%)  | 21 (12.4%) |
| <i>Macrolide</i>                  | <i>Erythromycin</i>                   | ERY      | 162 (95.9%)                  | 7 (4.1%)     | 0 (0%)      | 0 (0%)     |
| <i>Tetracycline</i>               | <i>Tetracycline</i>                   | TET      | 98 (58%)                     | 1 (0.6%)     | 70 (41.4%)  | 0 (0%)     |

**Supplementary Table 13: Prevalence of ARGs in DEC isolates**

| <i>AMR mechanism</i>          | <i>AMR family</i>                                  | <i>isCore gene</i> | <i>Total cnt</i> | <i>Prev</i> |
|-------------------------------|----------------------------------------------------|--------------------|------------------|-------------|
| Antibiotic inactivation       | ampC beta lactamase                                | Yes                | 189              | 100.00%     |
| Antibiotic efflux             | MacAB toIC ABC Transporter                         | Yes                | 189              | 100.00%     |
| Antibiotic efflux             | msbA ABC Transporter                               | Yes                | 189              | 100.00%     |
| Antibiotic efflux             | mdtNOP MFS efflux pump                             | Yes                | 189              | 100.00%     |
| Antibiotic efflux             | mdtH MFS efflux pump                               | Yes                | 189              | 100.00%     |
| Antibiotic efflux             | mdtABC toIC RND efflux pump                        | Yes                | 189              | 100.00%     |
| Antibiotic efflux             | mdfA MFS efflux pump                               | Yes                | 189              | 100.00%     |
| Antibiotic efflux             | EmrKY toIC MFS efflux pump                         | Yes                | 189              | 100.00%     |
| Antibiotic efflux             | EmrAB toIC MFS efflux pump                         | Yes                | 189              | 100.00%     |
| Antibiotic efflux             | acrD RND efflux pump                               | Yes                | 189              | 100.00%     |
| Antibiotic efflux             | AcrAB toIC RND efflux pump                         | Yes                | 189              | 100.00%     |
| Antibiotic efflux             | Yoji ABC Transporter                               | Yes                | 189              | 100.00%     |
| Antibiotic target alteration  | Undecaprenyl pyrophosphate related proteins        | Yes                | 189              | 100.00%     |
| Antibiotic target alteration  | Pmr phosphoethanolamine transferase                | Yes                | 189              | 100.00%     |
| Antibiotic inactivation       | BlaEC beta lactamase                               | Yes                | 188              | 99.47%      |
| Antibiotic efflux             | Unknown ABC Transporter                            | Yes                | 188              | 99.47%      |
| Antibiotic efflux             | mdtEF toIC RND efflux pump                         | Yes                | 188              | 99.47%      |
| Antibiotic efflux             | mdtG MFS efflux pump                               | Yes                | 187              | 98.94%      |
| Antibiotic efflux             | AcrEF toIC RND efflux pump                         | Yes                | 184              | 97.35%      |
| Antibiotic inactivation       | MphB macrolide phosphotransferase                  | Yes                | 181              | 95.77%      |
| Antibiotic efflux             | mdtM MFS efflux pump                               | Yes                | 180              | 95.24%      |
| Antibiotic efflux             | emrE SMR efflux pump                               | No                 | 115              | 60.85%      |
| Antibiotic target replacement | sul sulfonamide resistant dihydropteroate synthase | No                 | 88               | 46.56%      |
| Antibiotic inactivation       | TEM beta lactamase                                 | No                 | 82               | 43.39%      |
| Antibiotic target replacement | dhfr                                               | No                 | 76               | 40.21%      |
| Antibiotic inactivation       | APH6                                               | No                 | 66               | 34.92%      |
| Antibiotic inactivation       | APH3                                               | No                 | 64               | 33.86%      |
| Antibiotic target alteration  | fluoroquinolone resistant gyrA                     | No                 | 48               | 25.40%      |
| Antibiotic efflux             | tetA MFS efflux pump                               | No                 | 46               | 24.34%      |
| Antibiotic inactivation       | ANT3                                               | No                 | 36               | 19.05%      |
| Antibiotic efflux             | qac MFS efflux pump                                | No                 | 36               | 19.05%      |
| Antibiotic efflux             | tetAB ABC Transporter                              | No                 | 31               | 16.40%      |
| Antibiotic target protection  | qnrB Quinolone resistance protein                  | No                 | 25               | 13.23%      |
| Antibiotic inactivation       | catA chloramphenicol acetyltransferase             | No                 | 21               | 11.11%      |
| Antibiotic inactivation       | MphA macrolide phosphotransferase                  | No                 | 21               | 11.11%      |
| Antibiotic efflux             | Unknown RND efflux pump                            | No                 | 18               | 9.52%       |
| Antibiotic efflux             | mexEF OprN RND efflux pump                         | No                 | 17               | 8.99%       |
| Antibiotic target alteration  | fluoroquinolone resistant parC                     | No                 | 13               | 6.88%       |
| Antibiotic target protection  | Unknown ABC F proteins                             | No                 | 11               | 5.82%       |
| Antibiotic inactivation       | sat2 streptothricin acetyltransferase              | No                 | 10               | 5.29%       |
| Antibiotic target alteration  | fluoroquinolone resistant parE                     | No                 | 9                | 4.76%       |
| Antibiotic target alteration  | Erm 23S rRNA Methyltransferase                     | No                 | 8                | 4.23%       |
| Antibiotic inactivation       | Unknown Class B beta lactamase                     | No                 | 6                | 3.17%       |
| Antibiotic inactivation       | CTX M beta lactamase                               | No                 | 6                | 3.17%       |

|                              |                                     |    |   |       |
|------------------------------|-------------------------------------|----|---|-------|
| Antibiotic inactivation      | OXA beta lactamase                  | No | 4 | 2.12% |
| Antibiotic inactivation      | AAC3                                | No | 3 | 1.59% |
| Antibiotic inactivation      | FosA Fosfomycin thiol transferase   | No | 3 | 1.59% |
| Antibiotic target protection | qnrS Quinolone resistance protein   | No | 3 | 1.59% |
| Antibiotic efflux            | qepA MFS efflux pump                | No | 2 | 1.06% |
| Antibiotic inactivation      | AAC6                                | No | 1 | 0.53% |
| Antibiotic efflux            | flo MFS efflux pump                 | No | 1 | 0.53% |
| Antibiotic efflux            | cmlA MFS efflux pump                | No | 1 | 0.53% |
| Antibiotic inactivation      | Unknown Class A beta lactamase      | No | 1 | 0.53% |
| Antibiotic inactivation      | CMY beta lactamase                  | No | 1 | 0.53% |
| Antibiotic inactivation      | CARB beta lactamase                 | No | 1 | 0.53% |
| Antibiotic inactivation      | Bleomycin Resistant Protein         | No | 1 | 0.53% |
| Antibiotic efflux            | Unknown MFS efflux pump             | No | 1 | 0.53% |
| Antibiotic efflux            | oqxAB RND efflux pump               | No | 1 | 0.53% |
| Antibiotic target alteration | MCR phosphoethanolamine transferase | No | 1 | 0.53% |
| Antibiotic target protection | qnrA Quinolone resistance protein   | No | 1 | 0.53% |

**Supplementary Table 14: Modified scoring scheme for diarrhea sample evaluation**

|          |                                                                                                  | <b>1 point</b>         | <b>2 point</b>           | <b>3 point</b>                |
|----------|--------------------------------------------------------------------------------------------------|------------------------|--------------------------|-------------------------------|
| <b>A</b> | <b>High Level of care, Fever, Blood in stool, Pulse rate *</b>                                   | 0                      | 1-2                      | 3-4                           |
|          | High level of Care (Yes, No)                                                                     |                        |                          |                               |
|          | Fever (Yes, $\geq 38C$   No, $< 38C$ )                                                           |                        |                          |                               |
|          | Blood in Stool (Yes, No)                                                                         |                        |                          |                               |
|          | Pulse rate (High, $>100$   Normal, $\leq 100$ )                                                  |                        |                          |                               |
| <b>B</b> | <b>Maximum num of stools per day</b>                                                             | 1-3                    | 4-6                      | $\geq 7$                      |
| <b>C</b> | <b>Duration of diarrhea</b>                                                                      | 1-2                    | 3-4                      | $\geq 5$                      |
| <b>D</b> | <b>Stool Consistency</b>                                                                         | 1-2                    | 3                        | 4                             |
| <b>E</b> | <b>Presence of dehydration (thirsty, decreased urination, decreased skin turgor, dry mucus)*</b> | 1-2 (Some dehydration) | 3 (Moderate dehydration) | $\geq 4$ (Severe dehydration) |
| <b>F</b> | <b>Behavioral signs (lethargy, Fatigue, Faint, Loss of work, Anorexia, e.t.c.) *</b>             | 1                      | 2                        | 3                             |
|          | lost work, fatigue headache (0,1)                                                                |                        |                          |                               |
|          | Bloating, Abdominal cramp, Anorexia, bloating, Flatulence (0,1)                                  |                        |                          |                               |
|          | Vomiting, Nausea (0, 1)                                                                          |                        |                          |                               |
|          | * measured by taking the sum of the binarized parameters                                         |                        |                          |                               |

## **Supplementary Results**

### **Multiplex PCR for detection of diarrheagenic pathogens.**

Of the samples positive for DEC, enteropathogenic *E. coli* (EPEC; 49/217, 22.6%), enteroaggregative *E. coli* (EAEC; 45/217, 20.7%), and enterotoxigenic *E. coli* (ETEC; 42/217, 19.4%) were most commonly identified. Less frequently detected were diffusively adherent *E. coli* (DAEC; 31/217, 14.3%), Shiga toxin-producing *E. coli* (STEC; 20/217, 9.2%), and enteroinvasive *E. coli* (EIEC; 6/217, 2.8%). Consistent with the prior studies<sup>1</sup>, we observed significantly higher detection rate of *Campylobacter* (OR: 13.9; 95% CI: 3.6-54.5;  $P < 0.001$ ), ETEC (OR: 3.4; 95% CI: 1.7-6.9;  $P < 0.001$ ), and norovirus (OR: 2.7; 95% CI: 1.1-6.4;  $P = 0.03$ ) in diarrheal samples compared to non-diarrheal samples (Supplementary Table 13).

### **Antibiotic susceptibility testing of DEC isolates.**

Rates of MDR were most common among DAEC (89.3%, 25/28), followed by EAEC (75.0%, 33/44), and EPEC (65.9%, 29/45) pathotypes, and less frequent among ETEC (59.5%, 22/37) and STEC (30.8%, 4/13) pathotypes. No resistance was detected against imipenem, ceftazidime, cefotaxime-clavulanate, nitrofurans, or amikacin. In contrast, high rates of resistance were detected against erythromycin (ERY; 95.9%, n=162), ampicillin (AMP; 65.7%, n=111), ticarcillin (TIC; 60.9%, n=103), tetracycline (TET; 58.0%, n=98), and trimethoprim-sulfamethoxazole (SXT; 53.3%, n=90) (Supplementary Table 14). Resistance to gentamycin (GEN; 3.6%, n=6), and 3<sup>rd</sup> and 4<sup>th</sup> generation cephalosporins (CRO; 1.8% n=3; FEP; 0.6%, n=1) was detected, but were relatively infrequent.

### **Isolate WGS and phylogeny.**

The average genome size—representing both chromosomal and plasmid DNA—of the remaining 189 DEC isolates (non-diarrheal=139, diarrheal=50) was 5.1 Mb (range: 4.6-5.8 Mb) with a median N50 of 128 Kb. The multi-locus sequence type (MLST) profiles of these isolates represented 74 unique sequence types, with ST10 (42/189, 22.2%) and ST21 (15/189, 7.9%) being the most common in Clades A and B1. Among 189 sequenced DEC isolates, only ETEC (OR: 3.65; 95% CI: 1.5-8.7;  $P = 0.002$ ) was significantly associated with diarrheal samples. No significant association was detected with other DEC types.

To further explore the diversity and distribution of AMR determinants harbored by isolates among travelers, we screened the draft genomes for known ARGs and point mutations that confer resistance (e.g., *gyrA*, *parC*, *parE*, and *pmrB*). In total, we identified 60 unique AMR determinants, including 21 core (present in  $\geq 95\%$  of isolates) and 39 accessory resistance determinants (Supplementary Table 15, see Methods). Consistent with previous findings, the core resistome of

DEC isolates included genes that mediate resistance to multiple drugs via efflux pumps<sup>2</sup>. The accessory resistome, however, was widely variable with no clear association with phylogroups or sample type (Supplementary Fig. 7a). The most common accessory ARGs were *emrE* efflux pumps (115 isolates, 60.9%), alleles of *sul* mediating resistance to sulfonamides (*sul1*, *sul2*, *sul3*, 88 isolates, 46.6%), ESBL-mediating *bla*<sub>TEM</sub> (*bla*<sub>TEM-148</sub>, *bla*<sub>TEM-206</sub>, 82 isolates, 43.4%), trimethoprim resistance *dhfr* genes (76 isolates, 40.2%), and aminoglycoside resistance genes *aph6-IId* and *aph3*" (66 isolates, 34.9%). In addition, we detected point mutations in *gyrA* (S83L: 30, S83A: 14, D87N: 8, D87Y: 4, 48 isolates, 25.4%), *parC* (S80I: 9, A56T: 4, E84G: 2, E84V: 2, S57T: 2, 13 isolates, 6.9%), and *parE* (I355T: 3, I529L: 2, L416F: 2, S458A: 2, 9 isolates, 4.8%) quinolone resistance-determining region (QRDR) genes. The frequency of these prevalent accessory ARGs (present in ≥10% of isolates) was similar in DEC strains isolated from diarrheal and non-diarrheal samples (Supplementary Fig. 7b).



## Supplementary Notes

### Form –A Cohort Enrollment Form: Background information

---

First Name(s): \_\_\_\_\_  
Surname(s): \_\_\_\_\_  
Today's date (M/D/Y): \_\_\_\_/\_\_\_\_/\_\_\_\_ Age: \_\_\_\_\_ Blood Type \_\_\_\_\_ Sex: ( ) Male ( ) Female  
E-mail address: \_\_\_\_\_  
Mobile Phone: \_\_\_\_\_ Native Language: \_\_\_\_\_  
Nationality: \_\_\_\_\_ Country of Residence: \_\_\_\_\_  
City of Residence \_\_\_\_\_ Occupation: \_\_\_\_\_

Date Arrived in Peru (M/D/Y) \_\_\_\_/\_\_\_\_/\_\_\_\_ Date arrived in Cusco (M/D/Y): \_\_\_\_/\_\_\_\_/\_\_\_\_  
Planned date of departure (M/D/Y): \_\_\_\_/\_\_\_\_/\_\_\_\_

Lodging in Cusco:  
( ) School Lodging Building \_\_\_\_\_ Room Number \_\_\_\_\_  
( ) Host Family Address \_\_\_\_\_  
( ) Other \_\_\_\_\_

Have you ever lived in a developing country greater than 1 month? ( ) Yes ( ) No  
If so, which country or countries? \_\_\_\_\_

In the past 12 months, have you visited other countries prior to your arrival in Perú? ( ) Yes ( ) No  
If so, please list the country / countries visited.

| Country | Month/Year Visited | Number of Days Visited |
|---------|--------------------|------------------------|
| _____   | ____/____          | _____                  |
| _____   | ____/____          | _____                  |
| _____   | ____/____          | _____                  |
| _____   | ____/____          | _____                  |

#### Travel Medicine Information

Do you currently have health insurance with international coverage? ( ) Yes ( ) No  
Did you receive any preventive medicine information before your trip? ( ) Yes ( ) No

What was the method of delivery for the travel medicine information?  
( ) Paper handout or article ( ) A lecture ( ) Online training/website ( ) Clinic Visit  
( ) Other \_\_\_\_\_

What topics were covered in this training (mark all that apply)? ( ) Malaria ( ) Diarrhea prevention ( ) Insect Protection ( ) Sun and environmental protection ( ) Altitude sickness ( ) Healthcare access ( ) Travel insurance ( ) Personal hygiene ( ) Food safety ( ) Pre-travel vaccinations ( ) Safe sex ( ) responsible alcohol consumption ( ) Country specific diseases ( ) Personal safety

#### Health Status

In the past two weeks, did you have diarrhea (3 or more loose or watery stools during any 24-hour period) or vomiting prior to your arrival in Cusco?  
( ) Yes ( ) No  
In the past 2 weeks have you taken antibiotics? ( ) Yes ( ) No  
What antibiotics? \_\_\_\_\_

#### Vaccination Card Review:

Hepatitis A ( ) Yes ( ) No ( ) Not sure  
Cholera ( ) Yes ( ) No ( ) Not sure  
Typhoid (Oral) ( ) Yes ( ) No ( ) Not sure  
Typhoid (Injectable) ( ) Yes ( ) No ( ) Not sure

#### Eating Habits

When eating in a developing country, do you eat raw vegetables?  
( ) Always ( ) Almost always ( ) Sometimes ( ) Rarely ( ) Never

When eating in a developing country, do you eat raw fruits that have not been peeled?  
( ) Always ( ) Almost always ( ) Sometimes ( ) Rarely ( ) Never

When traveling in a developing country, do you drink the local water?  
( ) Always ( ) Almost always ( ) Sometimes ( ) Rarely ( ) Never

When traveling in a developing country, do you drink unbottled beverages or drinks with ice?  
( ) Always ( ) Almost always ( ) Sometimes ( ) Rarely ( ) Never

Do you eat raw or undercooked meat or fish including ceviche?  
( ) Always ( ) Almost always ( ) Sometimes ( ) Rarely ( ) Never

Do you add sauces to your food?  
( ) Always ( ) Almost always ( ) Sometimes ( ) Rarely ( ) Never

Do you wash your hands before eating?  
( ) Always ( ) Almost always ( ) Sometimes ( ) Rarely ( ) Never



# Form –B GI Illness Symptoms

**GI Illness Episode Form**      **Participant Code** \_\_\_\_\_

First Name(s) \_\_\_\_\_ Today's Date \_\_\_\_/\_\_\_\_/\_\_\_\_  
 Surname(s) \_\_\_\_\_  
 Date/Time of Onset of Illness: Time (24-hour format) \_\_\_\_\_ Date \_\_\_\_/\_\_\_\_/\_\_\_\_ Date Well \_\_\_\_/\_\_\_\_/\_\_\_\_

| Days from start of illness      |   |   |   |   |   |   |   |   |   |    |    |    |    |    |
|---------------------------------|---|---|---|---|---|---|---|---|---|----|----|----|----|----|
| Symptoms                        | 1 | 2 | 3 | 4 | 5 | 6 | 7 | 8 | 9 | 10 | 11 | 12 | 13 | 14 |
| Interviewer's Initials          |   |   |   |   |   |   |   |   |   |    |    |    |    |    |
| Date Year: 20 ____/____/____    |   |   |   |   |   |   |   |   |   |    |    |    |    |    |
| Days on Antibiotics             |   |   |   |   |   |   |   |   |   |    |    |    |    |    |
| Stools Last 24hrs               |   |   |   |   |   |   |   |   |   |    |    |    |    |    |
| Stool Consistency               |   |   |   |   |   |   |   |   |   |    |    |    |    |    |
| Stool Quality                   |   |   |   |   |   |   |   |   |   |    |    |    |    |    |
| Lost Work/Decreased Activity    |   |   |   |   |   |   |   |   |   |    |    |    |    |    |
| Loss of Bowel Control/Urgency   |   |   |   |   |   |   |   |   |   |    |    |    |    |    |
| Blood in Stools                 |   |   |   |   |   |   |   |   |   |    |    |    |    |    |
| Vomiting last 24hrs             |   |   |   |   |   |   |   |   |   |    |    |    |    |    |
| Nausea                          |   |   |   |   |   |   |   |   |   |    |    |    |    |    |
| Anorexia                        |   |   |   |   |   |   |   |   |   |    |    |    |    |    |
| Flatulence                      |   |   |   |   |   |   |   |   |   |    |    |    |    |    |
| Bloating                        |   |   |   |   |   |   |   |   |   |    |    |    |    |    |
| Abdominal Cramping              |   |   |   |   |   |   |   |   |   |    |    |    |    |    |
| Tenesmus (Straining)            |   |   |   |   |   |   |   |   |   |    |    |    |    |    |
| Subjective Fever                |   |   |   |   |   |   |   |   |   |    |    |    |    |    |
| Headaches                       |   |   |   |   |   |   |   |   |   |    |    |    |    |    |
| Muscle Cramps                   |   |   |   |   |   |   |   |   |   |    |    |    |    |    |
| Rash                            |   |   |   |   |   |   |   |   |   |    |    |    |    |    |
| Joint Pain                      |   |   |   |   |   |   |   |   |   |    |    |    |    |    |
| Thirsty                         |   |   |   |   |   |   |   |   |   |    |    |    |    |    |
| Decreased Urination             |   |   |   |   |   |   |   |   |   |    |    |    |    |    |
| Dark Urine Color                |   |   |   |   |   |   |   |   |   |    |    |    |    |    |
| Feels Faint/Dizzy Upon Standing |   |   |   |   |   |   |   |   |   |    |    |    |    |    |
| Fatigue                         |   |   |   |   |   |   |   |   |   |    |    |    |    |    |

**Last Name(s)** \_\_\_\_\_      **Participant Code** \_\_\_\_\_

| Days from start of illness   |   |   |   |   |   |   |   |   |   |    |    |    |    |    |
|------------------------------|---|---|---|---|---|---|---|---|---|----|----|----|----|----|
| Signs                        | 1 | 2 | 3 | 4 | 5 | 6 | 7 | 8 | 9 | 10 | 11 | 12 | 13 | 14 |
| Date Year: 20 ____/____/____ |   |   |   |   |   |   |   |   |   |    |    |    |    |    |
| Temperature                  |   |   |   |   |   |   |   |   |   |    |    |    |    |    |
| Pulse Laying*                |   |   |   |   |   |   |   |   |   |    |    |    |    |    |
| Pulse Sitting*               |   |   |   |   |   |   |   |   |   |    |    |    |    |    |
| Pulse Standing*              |   |   |   |   |   |   |   |   |   |    |    |    |    |    |
| Orthostatic Tachycardia*     |   |   |   |   |   |   |   |   |   |    |    |    |    |    |
| Blood Pressure Laying*       |   |   |   |   |   |   |   |   |   |    |    |    |    |    |
| Blood Pressure Sitting       |   |   |   |   |   |   |   |   |   |    |    |    |    |    |
| Blood Pressure Standing*     |   |   |   |   |   |   |   |   |   |    |    |    |    |    |
| Orthostatic Hypotension*     |   |   |   |   |   |   |   |   |   |    |    |    |    |    |
| Lethargy                     |   |   |   |   |   |   |   |   |   |    |    |    |    |    |
| Decreased Skin Turgor        |   |   |   |   |   |   |   |   |   |    |    |    |    |    |
| Dry Mucus Membranes          |   |   |   |   |   |   |   |   |   |    |    |    |    |    |

\*Tilts only have to be performed during the initial evaluation or if the patient reports orthostatic symptoms.

Have you had prior medical attention for this diarrhea? ( ) Yes ( ) No  
 If so, where did you receive medical attention: \_\_\_\_\_ Date seen: \_\_\_\_/\_\_\_\_/\_\_\_\_

Have you been self-medicating? ( ) Yes ( ) No If so, what medication(s): \_\_\_\_\_  
 Did you get the medication from: ( ) your personal stash ( ) a friend ( ) a pharmacy in Perú ( ) new prescription  
 Do you know anyone else who was recently sick with similar symptoms? ( ) Yes ( ) No  
 If so, was it a: ( ) fellow class mate ( ) local person ( ) new visitor ( ) school staff ( ) girl/boy friend ( ) Other

**Initial Treatment:**      **Date/Time of Treatment:** \_\_\_\_\_ **Time (24-hour format)** \_\_\_\_\_ **Date** \_\_\_\_/\_\_\_\_/\_\_\_\_  
 ( ) Increase Fluid Intake    ( ) ORS Solution    ( ) Phenergan    ( ) IV fluids (Type \_\_\_\_\_ Qty: \_\_\_\_\_ L)  
 ( ) Immodium    ( ) Pepto-Bismol    ( ) Tylenol    ( ) Other: \_\_\_\_\_  
 \_\_\_\_\_ Name/dose/frequency  
 ( ) Antibiotic \_\_\_\_\_ Name/dose/frequency

Was patient referred to a higher level of care? ( ) Yes ( ) No      **Stool Collected and Processed:** ( ) Yes ( ) No  
 Doctor's Notes \_\_\_\_\_

## **Supplementary References**

- 1 Bodhidatta, L. *et al.* Epidemiology and etiology of Traveler's diarrhea in Bangkok, Thailand, a case-control study. *Tropical diseases, travel medicine and vaccines* **5**, 9, doi:10.1186/s40794-019-0085-9 (2019).
- 2 Goldstone, R. J. & Smith, D. G. E. A population genomics approach to exploiting the accessory 'resistome' of *Escherichia coli*. *Microbial genomics* **3**, e000108, doi:10.1099/mgen.0.000108 (2017).
